1     **Genetically variant human pluripotent stem cells selectively eliminate wild-type**  
2                     **counterparts through YAP-mediated cell competition**

3

4     Christopher J. Price<sup>1</sup>, Dylan Stavish<sup>1</sup>, Paul J. Gokhale<sup>1</sup>, Samantha Sargeant<sup>1,2</sup>, Joanne  
5     Lacey<sup>1</sup>, Tristan A. Rodriguez<sup>3</sup>, Ivana Barbaric<sup>1,\*</sup>

6

7     <sup>1</sup>Centre for Stem Cell Biology, Department of Biomedical Science, The University of  
8     Sheffield, Western Bank, Sheffield, S10 2TN, United Kingdom

9     <sup>2</sup>Centre for Signal Processing and Complex Systems, Department of Automatic Control  
10    and Systems Engineering, University of Sheffield, Mappin Street, Sheffield, S1 3JD,  
11    United Kingdom

12    <sup>3</sup>National Heart and Lung Institute, Imperial Centre for Translational and  
13    Experimental Medicine, Imperial College London, Hammersmith Hospital Campus,  
14    Du Cane Road, London, W12 0NN, United Kingdom

15

16    \*Correspondence: [i.barbaric@sheffield.ac.uk](mailto:i.barbaric@sheffield.ac.uk)

17

18    Running title: Super-competition in hPSC cultures

19

20

21 **Abstract**

22 The appearance of genetic changes in human pluripotent stem cells (hPSCs) presents a  
23 concern for their use in research and regenerative medicine. Variant hPSCs harbouring  
24 recurrent culture-acquired aneuploidies display growth advantages over wild-type  
25 diploid cells, but the mechanisms yielding a drift from predominantly wild-type to  
26 variant cell populations remain poorly understood. Here we show that the dominance  
27 of variant clones in mosaic cultures is enhanced through competitive interactions  
28 resulting in elimination of wild-type cells. This elimination occurs through corralling  
29 and mechanical compression by faster growing variants, causing a redistribution of F-  
30 actin and sequestration of YAP in the cytoplasm that induces apoptosis in wild-type  
31 cells. Importantly, YAP overexpression in wild-type cells is sufficient to alleviate their  
32 loser phenotype. Our results demonstrate that hPSC fate is coupled to mechanical cues  
33 imposed by neighbouring cells and reveal that hijacking this mechanism allows variants  
34 to achieve clonal dominance in cultures.

35

36 **Keywords:** human pluripotent stem cells, culture acquired variants, cell competition,  
37 YAP

38

## 39 **Introduction**

40 Cell-cell interaction is a critical feature of multicellular organisms, necessary for the  
41 orderly development of tissues and maintenance of their homeostasis. The ability of  
42 cells to influence their neighbouring cells' fate choices has become apparent from  
43 studies in various *in vitro* and *in vivo* models. An example of this is cell competition, a  
44 type of cell-cell interaction wherein viable but less-fit "loser" cells are outcompeted  
45 for nutrients or space and eventually eliminated by the fitter "winner" cells (reviewed  
46 in (Bowling et al., 2019)). Initially described and studied in *Drosophila* as a tissue  
47 homeostatic mechanism (Morata and Ripoll, 1975), over recent years it has become  
48 evident that a form of cell competition, known as super-competition, is implicated in  
49 expansion of cancerous cells (Eichenlaub et al., 2016; Suijkerbuijk et al., 2016). In  
50 super-competition, the acquisition of a mutation which enhances the relative fitness of  
51 a cell results in the removal of neighbouring wild-type cells (Johnston, 2014).

52 In the context of regenerative medicine, the fundamental question of how  
53 mutant cells may influence behaviour of their wild-type counterparts has been brought  
54 into focus by observation that human pluripotent stem cells (hPSCs) acquire genetic  
55 changes upon prolonged passaging (Draper et al., 2004; International Stem Cell et al.,  
56 2011). Studies of genetic integrity of hPSCs over the last two decades have revealed a  
57 bias in genetic changes acquired in hPSCs, with the most common karyotypic  
58 abnormalities involving gains of chromosomes 1, 12, 17, 20 and X (Baker et al., 2007;  
59 Draper et al., 2004; International Stem Cell et al., 2011). The recurrent nature of genetic  
60 abnormalities in hPSCs is indicative of such changes conferring selective growth  
61 advantage to the variant cells (Baker et al., 2007; Draper et al., 2004). The implications  
62 of the variant presence could be significant for therapeutic and research uses of hPSCs,  
63 as altered behaviour of variant cells could impact on the efficiency of differentiation

64 protocols, functionality of differentiated cells or the safety of cell replacement therapies  
65 (Andrews et al., 2017). Of particular safety concern is the observation that aneuploidies  
66 commonly observed in hPSCs, such as the gain of chromosomes 12 or 17, are also  
67 characteristic of the malignant PSCs of germ cell tumours, teratocarcinomas (Andrews  
68 et al., 2005; Harrison et al., 2007). Hence, resolving the mechanisms that lead to genetic  
69 changes and their subsequent overtake of hPSC culture is pivotal for informing  
70 approaches to minimise the appearance of genetic variants in culture.

71         The emergence of variant cells in hPSC cultures has been likened to the process  
72 of evolution, whereby the interplay of mutation and selection leads to the expansion of  
73 clones which possess the greatest growth advantage under particular culture conditions  
74 (Andrews et al., 2005). Indeed, selective advantage of commonly occurring genetic  
75 changes in hPSCs has been demonstrated through mixing experiments, wherein spiking  
76 a small proportion of variant cells into wild-type cultures resulted in a rapid overtake  
77 of cultures by the variants (Avery et al., 2013; Olariu et al., 2010). To explain the  
78 reasons behind the variant overtake of cultures, studies of variant cells have mostly  
79 focused on the intrinsic properties that could lead to their growth advantage, such as  
80 enhanced proliferation and reduced levels of apoptosis (Avery et al., 2013; Barbaric et  
81 al., 2014; Ben-David et al., 2014; Draper et al., 2004; Enver et al., 2005; Nguyen et al.,  
82 2014). Yet, when the variant cells first emerge, they co-exist within the same culture as  
83 the wild-type cells, and hence share the culture environment as well as a proportion of  
84 their cell-cell contacts. However, little is known about the nature of cell-cell interactions  
85 of wild-type and variant cells in mixed cultures and whether the presence of variants  
86 affects the growth and survival of wild-type hPSCs.

87         Here, we show that an important aspect of the competitive advantage displayed  
88 by some of the commonly occurring variant hPSCs is the ability to induce apoptosis of

89 wild-type cells in mosaic cultures, akin to the super-competition-like behaviour  
90 described in other cell types (de la Cova et al., 2004; Moreno and Basler, 2004). The  
91 elimination of loser cells in hPSC cultures is exerted through mechanical cues, and is  
92 mediated by YAP, downstream of the actomyosin cytoskeleton. Our findings illuminate  
93 the reliance of hPSC fates on their mechanical environment and highlight the need for  
94 consideration of culture space limitations in the scale up of hPSCs for research or  
95 clinical use.  
96

## 97 **Results**

### 98 **Variant hPSCs selectively eliminate diploid wild-type counterparts from co-** 99 **cultures**

100 To uncover the reasons behind the rapid overtake of cultures by genetically variant  
101 hPSCs (Olariu et al., 2010), we sought to examine how wild-type and genetically  
102 variant hPSCs interact and whether they affect each other's growth. To this end, we  
103 initially used two diploid H7 sublines (either non-modified or genetically engineered to  
104 constitutively express red fluorescent protein (RFP), termed wild-type and wild-type-  
105 RFP, respectively), and their aneuploid variant harbouring a gain of chromosomes 1,  
106 12, 17q and 20q CNV, and stably expressing green fluorescent protein (GFP) (termed  
107 variant-GFP). Time-lapse microscopy of co-cultures containing wild-type-RFP and  
108 variant-GFP cells showed a selective elimination of wild-type-RFP cells during a three-  
109 day culture period (**Video S1**). To establish that the observed elimination is due to the  
110 presence of variant cells in mixed cultures we compared the growth rates of wild-type-  
111 RFP or unlabelled wild-type cells in separate culture to how they grew in mixed cultures  
112 with variant-GFP cells. Wild-type sublines were viable and created well-established,  
113 large colonies in separate culture, but consistent with previous findings, did grow  
114 slower than variant cells (**Figure 1A; Figure S1A**) (Barbaric et al., 2014; Enver et al.,  
115 2005). In contrast to this, strikingly, upon mixing the equal numbers of variant-GFP  
116 cells, the wild-type-RFP or unlabelled wild-type cells showed severely compromised  
117 growth (**Figure 1B-D; Figure S1B-D**). The co-culture had no effect on the number of  
118 variant-GFP cells (**Figure 1A,B; Figure S1A,B**). We confirmed that the same  
119 competitive interaction occurred in another pair of diploid and aneuploid cells of a  
120 different hPSC line (H14), with aneuploid cells also outcompeting diploid cells in co-  
121 cultures (**Figure S2**). Overall, these experiments demonstrated that the presence of

122 variant cells negatively affects the numbers of wild-type cells in co-cultures with  
123 variants.

124 The elimination of wild-type cells which occurred in co-culture with variant  
125 cells is reminiscent of cell competition described in many different systems, whereby  
126 ‘weaker’ *loser* cells are eliminated in the presence of ‘fitter’ *winner* cells (reviewed in  
127 (Bowling et al., 2019)). Cell competition typically involves inducing either senescence  
128 (Bondar and Medzhitov, 2010) or apoptosis (Brumby and Richardson, 2003; Moreno  
129 et al., 2002; Sancho et al., 2013) in loser cells. From our time-lapse analysis of wild-  
130 type-RFP cells co-cultured with either variant-GFP cells or unlabelled wild-type cells  
131 as a control, it was evident that the loser cells were not arresting in co-cultures (**Figure**  
132 **S3; Figure S4**). On the other hand, using cleaved caspase-3 staining as a readout of  
133 apoptosis, we observed that whilst wild-type and variant cells showed similar levels of  
134 cell death in separate culture, the proportion of apoptotic cells was significantly  
135 increased in wild-type cells upon co-culture with variants (**Figure 1E**). There was no  
136 change in the cleaved caspase-3 levels of variant-GFP cells upon co-culture with wild-  
137 type hPSCs (**Figure 1E**). Based on these results, we concluded that the presence of  
138 variant cells is inducing apoptosis and thereby elimination of wild-type cells from  
139 mosaic cultures.

#### 140 **Crowding of loser cells within mosaic cultures induces loser cell apoptosis**

141 Given the apparent selective elimination of wild-type cells when co-cultured with  
142 variant-GFP hPSCs, we wanted to establish whether the increased death rate of wild-  
143 type cells was mediated through cell-cell contacts or by cell-secreted diffusible factors,  
144 or the combination of both. To address these possibilities, we first made use of a  
145 Transwell assay (Boyden, 1962) to spatially separate the two populations whilst  
146 allowing the free exchange of secreted factors in the culture media. In these conditions,

147 the presence of variant-GFP cells did not increase the levels of activated caspase-3  
148 staining in wild-type cells compared to when wild-type cells were co-cultured with  
149 wild-type cells in Transwell cultures (**Figure 2A**), indicating that the effect of variants  
150 on wild-type cells is not mediated by soluble factors. In contrast to this, plating the  
151 increasing ratios of variant-GFP cells in co-cultures (from 10% to 90%) in a  
152 monolayer caused an increasing suppression of wild-type cell numbers (**Figure 2B**).  
153 This suppression of the wild-type cells' growth was density-dependent (**Figure 2C**)  
154 and was accompanied by increased cleaved caspase-3 staining (**Figure 2C; Figure**  
155 **S5A**). Together, these results demonstrate that cell competition in hPSC cultures is  
156 mediated by cell contact rather than by soluble factors.

157         The increased loss of wild-type cells which we observed upon increasing the  
158 ratio of variant cells in co-cultures, or upon plating the co-cultures at increasing cell  
159 densities, could be explained by two possibilities: either the higher numbers of wild-  
160 type-variant heterotypic cell contacts result in receptor-mediated cell competition  
161 (Burke and Basler, 1996), or alternatively, the winner cells are mechanically  
162 compressing the losers causing their eradication from cultures in a process termed  
163 mechanical cell competition (Levayer et al., 2016; Wagstaff et al., 2016). To distinguish  
164 between these possibilities, we first performed a cell confrontation assay, which allows  
165 two cell populations to be brought into contact at a clearly defined border (Moitrier et  
166 al., 2019; Porazinski et al., 2016). We reasoned that the receptor-mediated competition  
167 would result in cell apoptosis localised at the border of heterotypic cell contacts,  
168 whereas mechanical cell competition would result in the apoptotic signal spread  
169 throughout the areas of cell crowding (Bras-Pereira and Moreno, 2018). We plated  
170 wild-type-RFP and variant-GFP cells within separate chambers of a commercially  
171 available culture insert and allowed them to populate the area within their respective



172 chambers overnight. Upon removal of the insert, the cells from different chambers were  
173 allowed to come into contact with each other and were then cultured for a further 48h,  
174 prior to fixing and staining for the apoptotic marker cleaved caspase-3. Supporting the  
175 notion that cell competition in hPSC cultures is mediated through mechanical means,  
176 we found that the cleaved caspase-3 was distributed within the wild-type-RFP cells  
177 beyond the heterotypic border with variant-GFP cells (**Figure 2D**). This effect was  
178 specifically caused by the presence of variants in the cell confrontation assay, as inserts  
179 containing wild-type-RFP cells and unlabelled wild-type counterparts resulted in less  
180 caspase-3 staining compared with wild-type-RFP: variant-GFP confrontation cultures  
181 (**Figure 2E**). Moreover, time-lapse imaging of the cell fronts from the time of contact  
182 over the subsequent 48h also revealed that the wild-type-RFP hPSCs were pushed back  
183 by the advancing variant-GFP population (**Figure 2F; Video S2**), whereas the wild-  
184 type: wild-type-RFP cells boundary remained in a similar position over 48h of tracking  
185 (**Figure 2G; Video S3**). Together, these results suggest that the variant-GFP cells are  
186 mechanically superior to wild-type cells and outcompete them in the competition for  
187 space.

188         The competition for space that we detected in the cell confrontation assays was  
189 also evident in mosaic co-cultures grown in a monolayer, as tracking of wild-type-RFP  
190 and variant-GFP cells by time lapse microscopy uncovered an apparent corralling and  
191 subsequent elimination of wild-type cells by the faster growing variants (**Video S4**).  
192 We confirmed this effect by analysing the relative cell density of wild-type and variant-  
193 GFP cells in separate cultures and upon co-culture. The nuclei of wild-type cells in co-  
194 cultures clustered within areas of increased local density compared to the density within  
195 the separate wild-type culture (**Figure 2H,I**) and underwent apoptosis, as indicated by  
196 increased cleaved caspase-3 positive staining of corralled wild-type cells (**Figure S5B**).

197 Together, these results suggest that the corralling of wild-type cells by mechanically  
198 stronger variants within mosaic cultures causes them to crowd into areas of high local  
199 cell density and thereafter commit to apoptosis.

### 200 **Winner status is conferred onto cells by having a relatively higher proliferative** 201 **ability**

202 Given that a key feature of mechanical cell competition is the crowding of loser cells  
203 caused by the faster growing winners (Levayer et al., 2016; Wagstaff et al., 2016), we  
204 next asked whether the winner status in hPSC cultures is conferred onto cells by the  
205 ability to expand faster and thus fill the available space. To this end, we performed  
206 mixing experiments of H7 wild-type-RFP cells with a range of H7 variant sublines,  
207 which harboured distinct genetic changes and displayed diverse growth rates. For  
208 example, variant H7 sublines with a gain of 1q (from herein *v1q*) or a gain of 20q copy  
209 number variant (from herein *v20q*) had similar growth rates to wild-type-RFP hPSCs in  
210 separate cultures (**Figure 3A; Figure S6A**). As predicted, upon mixing with wild-type  
211 cells, the numbers of wild-type or variant cells (either *v1q* or *v20q*) remained unaffected  
212 (**Figure 3B; Figure S6B**). In addition, we tested the behaviour of another variant line  
213 (harbouring gains of chromosome 1, 17q and isochromosome 20q (termed *v1,17q,i20*))  
214 in co-culture with variant-GFP cells, as both lines grew at equivalent rates when  
215 cultured separately (**Figure S6C**). Again, the growth rate profiles of each of these  
216 variants were unaffected by their co-culture (**Figure S5D**), demonstrating that no  
217 competition takes place in cultures of cells with equivalent growth rates. Conversely,  
218 culturing variant lines *v1q* and *v20q* separately or in co-culture with the faster growing  
219 variant-GFP cells showed a significantly decreased number of *v1q* and *v20q* cells within  
220 co-cultures compared to separate cultures (**Figure 3C-E; Figure S6E,F**). We  
221 confirmed that the decrease of *v1q* and *v20q* cell numbers in co-cultures with variant-

222 GFP cells was due to apoptosis, as both sublimes showed higher levels of cleaved  
223 caspase-3 staining in the co-culture condition compared to separate culture (**Figure 3F**;  
224 **Figure S6G**). Nonetheless, neither the decrease in cell numbers nor the level of  
225 activated caspase-3 in *v1q* and *v20q* upon competition with variant-GFP was as  
226 extensive as seen in wild-type cells upon mixing with variant-GFP. The variant lines  
227 *v20q* and *v1q* harbour an additional copy of *BCL2L1* and *MCL-1*, respectively. The  
228 higher levels of expression of anti-apoptotic proteins BCL-XL and MCL-1 (**Figure**  
229 **S6H**) are thought to confer *v20q* and *v1q* cells with increased resistance to apoptosis  
230 (Avery et al., 2013; Nguyen et al., 2014). Given that *v1q* and *v20q* variants did not  
231 assume a winner status upon mixing with wild-type cells, our data revealed that  
232 increased resistance to apoptosis is not sufficient to confer a winner cell phenotype.  
233 Together, these results confirmed that cell competition behaviour is context-dependent,  
234 and that the faster proliferation rate is a feature of variant hPSCs exhibiting a winner  
235 cell phenotype. Moreover, we show that increased resistance to apoptosis is not  
236 sufficient to confer cells with a winner cell phenotype, but it reduces the rate of loser  
237 cell elimination.

### 238 **YAP mediates the winner versus loser cell phenotype in hPSCs**

239 To determine how cell competition in hPSC cultures is mediated at the molecular level,  
240 we initially performed transcription analysis of loser (*v1q*) and winner (variant-GFP)  
241 cells in separate and co-cultures (**Figure 4A**). We first focused on identifying  
242 expression signatures associated with prospective winner and loser populations, by  
243 analysing the differential gene expression between these cells in separate cultures  
244 (**Figure 4B, C**). In line with the complex aneuploidy of variant-GFP cells, the number  
245 of differentially expressed genes in winner versus loser cells was large, with 3524 genes  
246 significantly upregulated and 3311 genes significantly downregulated in winner

247 compared with loser cells (**Figure 4C**). The Kyoto Encyclopedia of Genes and  
248 Genomes (KEGG) enrichment analysis (Kanehisa et al., 2010) showed that the most  
249 significantly enriched molecular network from the downregulated genes was the  
250 ribosomal pathway, followed by the cell cycle, TGF- $\beta$  and Hippo pathway (**Figure 4D**).  
251 The Hippo signalling pathway, a key regulator of cellular fates, was also significantly  
252 enriched in the KEGG analysis of differentially expressed genes between winner and  
253 loser cells upon co-culture (**Figure 4E,F**). Given the apparent differences in the Hippo  
254 pathway between winner and loser cells, and also considering its known role in  
255 mechanical signalling (Codelia et al., 2014), we next asked whether the Hippo pathway  
256 is mediating cell competition in hPSC cultures.

257         A major effector of the Hippo signalling is the transcriptional co-activator Yes-  
258 associated protein 1 (YAP), which regulates gene expression of target genes through  
259 binding to the TEA domain DNA-binding family of transcription factors (TEAD) (Zhao  
260 et al., 2008). YAP localises to the nucleus when Hippo signalling is low, whereas active  
261 Hippo signalling results in YAP phosphorylation by LATS1/2 kinase and its  
262 cytoplasmic retention (reviewed in (Totaro et al., 2018)). Notably, YAP was shown to  
263 be modulated by mechanical signalling, including mechanical stresses imposed by  
264 neighbouring cells (reviewed in (Panciera et al., 2017)). We first checked YAP  
265 localisation in separate and mosaic cultures of wild-type and variant-GFP cells by  
266 immunofluorescence. YAP localised to the nucleus of both wild-type and variant-GFP  
267 cells when they were grown in separate cultures (**Figure 4G**). Strikingly, whilst the  
268 variant-GFP cells retained the nuclear YAP in co-cultures with wild-type cells, the  
269 wild-type cells within the same culture exhibited a shift in YAP localisation from  
270 nuclear to cytoplasmic (**Figure 4G**).

271 To directly address the hypothesis that YAP is mediating the super-competition  
272 behaviour of hPSCs, we overexpressed YAP in wild-type cells (**Figure S7A,B**) and  
273 analysed the effect of overexpression on the growth and behaviour of these cells in  
274 mosaic cultures. YAP overexpression resulted in the improved growth rates and  
275 increased homeostatic density of wild-type cells, suggesting an increased threshold to  
276 mechanical sensitivity imposed by neighbouring cells (**Figure 5A**). Further, YAP  
277 overexpressing cells exhibited a winner phenotype in co-cultures with wild-type cells  
278 (**Figure 5B; Figure S7C**). Finally, in comparison with wild-type cells, YAP  
279 overexpressing cells were more resistant to crowding caused by co-culture with variant-  
280 GFP cells as evidenced by higher numbers of YAP overexpressing cells persisting in  
281 co-cultures with variant-GFP cells (**Figure 5C; Figure S7D**). Based on these results,  
282 we concluded that YAP is mediating cell competition in hPSC cultures.

### 283 **Apical actin constriction regulates YAP localisation in hPSCs**

284 To gain further mechanistic insight into YAP-mediated hPSC competition, we  
285 set out to investigate the upstream regulators of YAP in this context. Our observation  
286 that wild-type hPSCs are corralled into smaller spaces upon co-culture with variants,  
287 coupled with the findings from other cell models that YAP localisation can be  
288 mechanically influenced by cell shape and actin fibers (Aragona et al., 2013; Wada et  
289 al., 2011), prompted us to examine the cytoskeleton as a potential regulator of YAP in  
290 hPSCs. Phalloidin staining of F-actin showed a similar basal-to-apical profile of actin  
291 fibers in wild-type and variant-GFP cells in separate cultures, with both populations  
292 exhibiting a faint staining of actin filaments encircling the cell within the adhesion belt  
293 (**Figure S8A**). However, whilst the variant cells retained a similar actin distribution  
294 upon co-culture with wild-type cells, the crowded wild-type cells showed a dramatic  
295 change in their actin fibre network (**Figure 6A**). Specifically, we detected a

296 redistribution of actin stress fibers within the adhesion belt, evident as intense staining  
297 of F-actin within the circumferential actin ring (**Figure 6A**). Expression of myosin IIB,  
298 a major non-muscle myosin, was also upregulated in the adhesion belt of the crowded  
299 wild-type cells (**Figure 6B**), reflecting the increased constriction of the adhesion belt  
300 in these cells upon co-culture with variants. The cytoplasmic YAP in wild-type cells  
301 was phosphorylated at Ser127 residue (**Figure 6C**), a known phosphorylation target of  
302 LATS1/2 kinase (Zhao et al., 2007), indicating that Hippo signalling is activated in  
303 wild-type hPSCs upon co-culture with variant cells, thus leading to sequestration of  
304 YAP in the cytoplasm of wild-type hPSCs.

305 To determine whether the observed cytoskeletal differences in winner and loser  
306 cells upon co-culture underpin the differences in their sub-cellular YAP localisation,  
307 we utilised a set of chemicals that perturb actinomyosin cytoskeleton. First, we used  
308 nocodazole to disrupt microtubules. Microtubule disruption, evident by diminished  $\alpha$ -  
309 tubulin staining (**Figure 7A**), reduced the adhesion belt contraction in crowded wild-  
310 type cells (**Figure 7A**). Concomitantly, we detected a shift from a predominantly  
311 cytoplasmic YAP in co-cultured wild-type cells to a diffuse (i.e. both cytoplasmic and  
312 nuclear) localisation in their nocodazole-treated counterparts (**Figure 7A**).  
313 Furthermore, YAP phosphorylation at serine 127 was suppressed upon nocodazole  
314 treatment of co-cultured wild-type cells (**Figure S8C**), confirming the lower levels of  
315 inactive form of YAP. Disruption of actin fibers using latrunculin A or cytochalasin B  
316 also resulted in reduced actin ring within the adhesion belt of crowded wild-type cells  
317 and a diffuse localisation of YAP in those cells (**Figure 7B**). On the other hand,  
318 inhibition of myosin activity by treating cells with the Rho-associated coiled coil kinase  
319 (ROCK) inhibitor had no overt effect on the sub-cellular localisation of YAP in wild-  
320 type and variant cells upon co-culture (**Figure 7C**). As Y-27632 changed the actin stress

321 fibers at the cell: extracellular matrix level, but did not reduce the intense actin staining  
322 within the adhesion belt of the crowded wild-type cells (**Figure 7C**), this data suggests  
323 that a constricted adhesion belt, rather than actin stress fibers, promotes cytoplasmic  
324 localisation of YAP in hPSCs. Taken together, we conclude that in hPSC cultures super-  
325 competitive variant cells corral wild-type counterparts into areas of significantly higher  
326 density compared with the density of wild-type separate cultures. Consequent  
327 restructuring of actin fibers within the adhesion belt of crowded wild-type hPSCs causes  
328 sequestering of YAP in their cytoplasm and triggers them to commit to apoptosis.  
329

## 330 **Discussion**

331 Suppressing the commonly arising variant hPSCs from overtaking the cultures requires  
332 a thorough understanding of the attributes that facilitate variant cells in achieving the  
333 clonal dominance. Here we report that the supremacy of particular variant clones in  
334 hPSC cultures is enhanced through competitive interactions with their wild-type  
335 counterparts, leading to the elimination of wild-type cells from mosaic cultures. The  
336 manner of wild-type cell elimination resembles previously described cell competition  
337 (Mamada et al., 2015; Morata and Ripoll, 1975; Sancho et al., 2013) in that the wild-  
338 type hPSCs, albeit viable in homotypic cultures, failed to thrive and underwent  
339 increased levels of apoptosis when co-cultured with variants. We showed that the  
340 competitive behaviour in hPSC context was not mediated by soluble factors, as the co-  
341 culture conditions in which winner and loser cells shared the same media, but had no  
342 direct cell contacts, did not cause apoptosis of loser cells. Instead, the winner cell  
343 phenotype was assumed by variant clones which possessed relatively faster growth  
344 rates and achieved higher homeostatic density compared to the loser cells. Thus, cell  
345 competition in hPSC cultures is akin to mechanical cell competition, which is  
346 characterised by faster-growing winner cells causing compaction and subsequent  
347 elimination of the slower-growing losers (Levayer et al., 2016; Wagstaff et al., 2016).

348         Given that variant hPSCs in homotypic cultures displayed a lower propensity to  
349 apoptosis compared with wild-type cells, differential sensitivity to apoptosis could be  
350 a plausible explanation for the selective elimination of loser cells upon competition for  
351 space with the variant counterparts. However, two lines of evidence from our study  
352 suggest that the resistance to mechanical forces, rather than apoptosis *per se*, determines  
353 the winner versus loser status in the context of mosaic hPSC cultures. First, variant lines  
354 which possessed increased resistance to apoptosis, but did not exhibit a proliferative



355 advantage and increased homeostatic density compared to wild-type cells, did not  
356 display a winner phenotype upon mixing with wild-type counterparts. Conversely, we  
357 detected a cell competition phenotype only upon mixing two sublines with differential  
358 proliferation rates, with a relatively faster subline adopting a winner status. Secondly,  
359 our observation that neighbouring loser and winner cells display differential  
360 distribution of mechanosensitive transcription regulator YAP, despite coexisting in the  
361 same culture, suggested that winner and loser hPSCs interpret their mechanical  
362 environments differently.

363         The remarkable changes in the shape of loser cells when corralled by variants,  
364 and the finding that variants displace the wild-type cells in cell confrontation assays,  
365 indicated a differential sensitivity of wild-type and variant cell populations to crowding  
366 upon competition for space in hPSC cultures. Whether the crowding sensing involves  
367 sensing cell volume and shape or direct sensing of mechanical forces (Valon and  
368 Levayer, 2019) remains unknown, nonetheless, our data point to the actomyosin  
369 cytoskeleton as a key mediator of crowding sensing in hPSCs. Indeed, we detected  
370 significant changes in the cytoskeleton of crowded loser cells, which displayed  
371 prominent staining of actin fibers within the adhesion belt. Accordingly, we showed  
372 that disruption of F-actin by cytochalasin B or latrunculin A, decouples the crowd  
373 sensing from YAP localisation, as YAP was retained in the nucleus of crowded loser  
374 cells treated with actin inhibitors. Although F-actin regulation of YAP has been  
375 previously noted (Aragona et al., 2013; Dupont et al., 2011), disruption of F-actin  
376 primarily led to cytoplasmic and not, as we observed, the nuclear localisation of YAP.  
377 The stark contrast of our findings with those previously published fits with the notion  
378 that the actomyosin activity has differing effects on the localisation of YAP at low and  
379 high cell density. This difference has been attributed to the remodelling of the actin

380 cytoskeleton from predominantly stress fibers to an apical actin ring at low and high  
381 density, respectively (Furukawa et al., 2017). Analogous to our findings, the actin  
382 inhibition in high cell density MDCK cells displaying a prominent circumferential belt  
383 and cytoplasmic YAP localisation, promoted re-distribution of YAP to nucleus  
384 (Furukawa et al., 2017). Therefore, it follows that the effect of actin cytoskeleton on  
385 YAP localisation is context and possibly cell type-dependent. Further investigation is  
386 warranted in order to delineate the exact mechanism by which hPSCs integrate  
387 environmental cues through their actin cytoskeleton to cease expansion, and how this  
388 mechanism may be evaded by variant cells in mechanical cell competition.

389 YAP was previously implicated in mechanical cell competition of several  
390 different experimental systems. In cells of aggressive brain tumors, glioblastomas, the  
391 level of YAP expression determines the winner versus loser cell status and contributes  
392 tumorigenesis by promoting the expansion of a clone with a higher expression of YAP  
393 and increased expression of downstream tumorigenic genes (Liu et al., 2019). In  
394 NIH3T3 embryonic fibroblasts, the transcription factor TEAD and its regulator YAP,  
395 have been also found to control cell proliferation and competition (Mamada et al.,  
396 2015). Perhaps of most significance for hPSC biology, TEAD-YAP axis was also  
397 shown to control cell competition in the pluripotent cells of the mouse epiblast  
398 (Hashimoto and Sasaki, 2019). In this context, cell competition was found to be a  
399 quality control mechanism regulating elimination of unspecified cells within the  
400 embryo. However, in contrast to various cell types grown *in vitro*, in pre-implantation  
401 mouse embryos YAP localisation appears decoupled from growth inhibition (Nishioka  
402 et al., 2009). Whether such decoupling holds true in post-implantation embryos and to  
403 what extent the sensitivity to crowding of hPSCs reflects biology of their *in vivo*  
404 counterparts is currently unknown.

405           The ability of some of the commonly acquired variant hPSCs to tolerate higher  
406 cell densities is reminiscent of transformed cells which evade the contact inhibition to  
407 achieve hyperproliferation. In numerous cancer cells, YAP is often either  
408 overexpressed or activated (Zanconato et al., 2016), although mutations in YAP itself,  
409 or additional genes within the Hippo pathway, are altogether relatively rare (Harvey et  
410 al., 2013). Given that commonly amplified regions in hPSC genome typically span  
411 several megabases (Baker et al., 2016), it is difficult to pinpoint potential driver from  
412 mere passenger mutations implicated in culture adaptation of hPSCs. Nonetheless,  
413 neither *YAP* nor several other key genes of the Hippo pathway (e.g. *WWTR1*, *TEAD1*,  
414 *LATS1*, *LATS2* and *NF2*) map to the chromosomes commonly amplified in variant  
415 hPSCs. Hence, based on the data thus far and drawing on parallels with the cancer field,  
416 it is tempting to speculate that pathways upstream of Hippo, may be affected by genetic  
417 changes in hPSCs. Based on the data in our study, genes implicated in the regulation of  
418 actin cytoskeleton and cell proliferation would be the prime candidates. In that respect,  
419 it is worth noting the recent identification of recurrent point mutations in hPSCs, which  
420 entail mutations in genes implicated in cytoskeleton and control of the cells cycle  
421 (Avior et al., 2019). It will be interesting to evaluate the behaviour of such mutants in  
422 the context of super-competition to narrow down the candidate genes that underpin this  
423 phenotype.

424           Whilst identification of driver genes in hPSC variants and their relationship to  
425 YAP regulation awaits further analyses, the observation that the variants exert their  
426 advantage through mechanical cell competition suggests that spatial constraints may  
427 have provided an important selective pressure leading to selection and fixation of  
428 commonly occurring variants. This notion becomes particularly likely when viewed in  
429 the light of the early reports of hPSC cultures that advocated hPSCs to be grown at a

430 high cell density, due to the need for cell-cell contacts in sustaining hPSC proliferation  
431 and survival (Fox et al., 2008; Thomson et al., 1998). Thus, it stands to reason that high  
432 cell density conditions created an environment for mechanical cell competition due to  
433 the lack of available space in expanding hPSC cultures. Intriguingly, not all commonly  
434 occurring variants that we tested displayed a super-competitive advantage in hPSC  
435 cultures, likely reflecting adaptation to different types of selective pressures, other than  
436 cell crowding. Ultimately, detailed characterisation of variants will allow not only the  
437 identification of conditions that select for them, but importantly, will also enable  
438 stratification of genetic variants as a necessary requirement for risk assessment of  
439 cellular therapy products. At least in theory, the most concerning would be the genetic  
440 variants that impinge on the behaviour of surrounding non-variant cells in a manner as  
441 described in this study.

442         Together, our results point to a model whereby mechanical cues from hPSC  
443 environment dictate the stem cell fate. The findings of our study hold a number of  
444 implications for the use of hPSCs in research and regenerative medicine. First, the  
445 finding that actin cytoskeleton mediates YAP localisation and ultimately cell fate in  
446 hPSCs opens up opportunity to harness this knowledge in order to control hPSC  
447 behaviour. Secondly, our conclusion that winner/loser status in hPSC cultures is  
448 determined by relative proliferative abilities of cells and YAP localisation provides a  
449 potential indicator that could be tested in order to allow stratification of potentially  
450 detrimental variants in the context of regenerative medicine. Finally, our results  
451 showing that cell crowding mediates survival advantage of the variants, coupled with  
452 the finding that high cell density conditions promote genome damage due to the media  
453 acidification (Jacobs et al., 2016), suggest that scaling up of hPSC cultures must be  
454 executed at carefully controlled cell densities.

455 In conclusion, our work revealed cell competition as an important aspect of  
456 cellular interaction of wild-type and variant hPSCs, contributing to the genetic drift that  
457 culminates in a complete overtake of cultures by super-competitive variant clones.  
458 Undertaking further detailed analyses of genetic variants that exhibit super-competitive  
459 behaviour should be informative for impact on regenerative medicine applications.

460

## 461 **METHODS**

### 462 **Human pluripotent stem cell (hPSC) lines**

463 Wild-type hPSCs used in this study were early passage sublines of H7 (WA07) and  
464 H14 (WA14), originally established in the laboratory of James Thomson (Thomson et  
465 al., 1998), which were karyotypically normal (based on at least 20 metaphases analysed  
466 by G-banding of cell banks prior to experiments and at various time points upon  
467 subsequent passaging) and did not possess a commonly gained 20q11.21 copy number  
468 variant (as determined by quantitative PCR for copy number changes and/or  
469 Fluorescent In Situ Hybridisation (Baker et al., 2016)). Spontaneous variants with  
470 karyotypic abnormalities were detected during the subsequent culture of H7 and H14  
471 cells at the Centre for Stem Cell Biology in Sheffield (Baker et al., 2007; Draper et al.,  
472 2004). Genetically variant sublines of H7 line used in this study and their karyotypes  
473 were: ‘variant-GFP’ cells [48,XX,+del(1)(p22p22),der(6)t(6;17)(q27;q1),+12] (30  
474 metaphases analysed), also harbouring chromosome 20q CNV as determined by  
475 quantitative PCR analysis and FISH (Baker et al., 2016); ‘v1,17q,i20’ [47,XX,  
476 +del(1)(p22p22), der(6)t(6;17)(q27;q1), t(12;20)(q13;q11.2), i(20)(q10)  
477 dup(20)(q11.21q11.21)] (30 metaphases analysed); and ‘v1q’ cells  
478 [46,XX,dup(1)(q21q42)] (30 metaphases analysed). The variant ‘v20q’ appeared to  
479 have a diploid karyotype when analysed by G-banding (30 metaphases analysed), but a

480 gain of a copy number variant 20q11.21 was detected by Fluorescent In Situ  
481 Hybridisation and quantitative PCR analysis. The karyotype of the H14 variant subline  
482 H14.BJ1-GFP was 48,XY,+12,+der(17)hsr(17)(p11.2) del(17)(p13.3) (20 metaphases  
483 analysed). Variants *v1q* and *v20q* were established in this study by cloning out  
484 spontaneously arising variants from mosaic cultures using single cell deposition by  
485 fluorescent activated cell sorting. Single cells from mosaic cultures were sorted directly  
486 into individual wells of a 96 well plate using a BD FACS Jazz and cultured to form  
487 colonies over 2-3 weeks. The resulting colonies were expanded in culture and  
488 subsequently frozen to establish cell banks. At the time of freezing, sister flasks were  
489 sent for karyotyping by G-banding and assessment of the relative copy number of  
490 commonly identified genetic changes by qPCR as described below.

491

#### 492 **Human pluripotent stem cell (hPSC) culture**

493 Flasks used for hPSC maintenance were coated with vitronectin (VTN-N) (Cat. #  
494 A14700, Life Technologies) diluted to 5 µg/ml in Dulbecco's phosphate buffered saline  
495 (PBS) and incubated at 37°C for 1h prior to aspirating the vitronectin solution and  
496 plating hPSCs. HPSCs were maintained in E8 medium prepared in house, consisting of  
497 DMEM/F12 (Cat. # D6421; Sigma-Aldrich) supplemented with 14 µg/l sodium  
498 selenium (Cat. # S5261; Sigma-Aldrich), 19.4 mg/l insulin (Cat. # A11382IJ; Thermo  
499 Fisher Scientific), 543 mg/l NaHCO<sub>3</sub> (Cat. # S5761; Sigma-Aldrich), 10.7 mg/l  
500 transferrin (Cat. # T0665; Sigma-Aldrich), 10 ml/l Glutamax (Cat. # 35050038; Thermo  
501 Fisher Scientific), 100µg/l FGF2 (Cat. # 100-18B; Peprotech) and 2 µg/l TGFβ1 (Cat.  
502 # 100-21; Peprotech) (Chen et al., 2011). For time lapse experiments, E8 was prepared  
503 using DMEM/F12 without phenol red (Cat. # D6434; Sigma-Aldrich). Cells were fed

504 daily and maintained at 37°C under a humidified atmosphere of 5% CO<sub>2</sub> in air. Routine  
505 passaging every 4-5 days was performed using ReLeSR (Cat. # 05873; STEMCELL  
506 Technologies) according to manufacturer's instructions. Cells were resuspended in E8  
507 and split at 1:3 or 1:4 ratio (wild type cells) or 1:8 to 1:30 ratio (variant sublines). Cells  
508 were genotyped after thawing and every 5-8 passages by G-banding, Fluorescent In  
509 Situ Hybridization and/or using quantitative PCR for common genetic changes.

510

### 511 **Karyotyping by G-banding**

512 Karyotyping by G-banding was performed by the Sheffield Diagnostic Genetics  
513 Service (<https://www.sheffieldchildrens.nhs.uk/sdgs/>). To capture the cells in  
514 metaphase, hPSC cultures were treated with 0.1 µg/ml KaryoMAX Colcemid Solution  
515 in PBS (Cat. # 15212012; Life Technologies) for 2 - 4h. Cells were then harvested with  
516 0.25% trypsin/versene (Gibco, Invitrogen) and pellets re-suspended in pre-warmed  
517 0.0375M KCl hypotonic solution. Following a 10 min incubation in KCl, cells were  
518 pelleted again and fixed with methanol:acetic acid (3:1). Metaphase spreads were  
519 prepared on glass microscope slides and trypsin solution briefly spread over the slides  
520 prior to staining with 4:1 Gurr's/Leishmann's stain (Cat. # L6254; Sigma-Aldrich).  
521 Slides were scanned, images of banded metaphases captured and analysed using the  
522 Leica Biosystems Cytovision Image Analysis system (version 7.5 build 72). At least 20  
523 metaphases were analysed.

524

### 525 **Fluorescent In Situ Hybridisation (FISH) for 20q copy number variant**

526 FISH for chromosome 20q copy number variant was performed by the Sheffield  
527 Diagnostic Genetics Service (<https://www.sheffieldchildrens.nhs.uk/sdgs/>). Cells were

528 harvested and pelleted at 270 g for 8 min. The cell pellet was resuspended in 0.0375 M  
529 potassium chloride pre-warmed to 37°C. After a 10 min incubation at room  
530 temperature, the cells were fixed in methanol:acetic acid (3:1). A small volume (~50µl)  
531 of cell suspension was dropped onto glass slides. The interphase FISH was performed  
532 using the *BCL2L1* probe covering the genes *BCL2L1*, *COX4I2* and 3' end of *IDI* (green  
533 fluorescently labelled BAC (RP5-857M17) provided by BlueGnome (Illumina)) and  
534 the 20q telomere probe the TelVysion 20q Spectrum Orange (Cat. # 08L52-001;  
535 Abbott). The cells on slides and probes were denatured by heating up to 72°C for 2 min  
536 in a PTC-200 DNA Engine (Peltier Thermal Cycler, MJ Research). Hybridisation was  
537 performed at 37°C for 16h. Slides were washed in 0.4x sodium citrate with 0.3% Tween  
538 20 and 2x sodium citrate with 0.1% Tween 20. Coverslips were mounted on the slides  
539 in 20µl, Vectashield Mounting Medium with DAPI (Cat. #: H-1200; Vector  
540 Laboratories). One hundred interphase cells were analysed on an Olympus BX51  
541 fluorescent microscope.

542

#### 543 **Quantitative PCR (qPCR) for determining copy number changes of target genes**

544 Relative copy number of commonly identified genetic changes was assessed using the  
545 qPCR-based approach described in (Baker et al., 2016). Genomic DNA was extracted  
546 from hPSCs using the DNeasy Blood & Tissue Kit (Cat. # 69504; QIAGEN) and  
547 digested with FastDigest EcoRI (Cat. # FD0275; Thermo Fisher Scientific) for 2 h at  
548 37°C, followed by inactivation at 65°C for 20 min. PCR reactions were set up in  
549 triplicate, with each 10µl PCR reaction containing 1X TaqMan Fast Universal Master  
550 Mix (Cat. # 4352042; Thermo Fisher Scientific), 100nM of forward and reverse primers  
551 (**Table S1**), 100nm of probe from the Universal Probe Library (**Table S1**) and 10ng of



552 genomic DNA. PCR reactions were run on a QuantStudio 12K Flex Thermocycler (Cat.  
553 # 4471087; Life Technologies). Following the first two steps of heating the samples to  
554 50°C for 2 min and denaturing them at 95°C for 10 min, reactions were subjected to 40  
555 cycles of 95°C for 15 s and 60°C for 1 min. The C<sub>q</sub> values were obtained from the  
556 QuantStudio 12K Flex Software with auto baseline settings and were then exported to  
557 Excel for copy number analysis using the relative quantification method ( $2^{-ddc_q}$ ). The  
558 calibrator samples for the qPCR assay were hPSC gDNA samples previously  
559 established as diploid using karyotyping and Fluorescent In Situ Hybridisation analyses  
560 (Baker et al., 2016).

561

#### 562 **Cell competition assay**

563 Cells were dissociated to single cells using TrypLE (Cat. # 11528856; Thermo Fisher  
564 Scientific) for 4 min at 37°C, washed once in DMEM/F12, counted and resuspended in  
565 E8 media supplemented with 10 $\mu$ M Y-27632 (Cat. # A11001-10; Generon). Cells were  
566 plated as separate cultures of each subline or mixed cultures of different sublines, as  
567 described in the individual experiments. After 24h, the medium was removed and the  
568 wells were washed once with basal medium DMEM/F12 (Cat. # D6421; Sigma-  
569 Aldrich) to remove the Y-27632. The medium was replaced with E8 and that point was  
570 considered as ‘day 0’ of competition experiments. Cells were cultured for further 72  
571 hours and fed daily with E8 medium. Cells were fixed at different time points post-  
572 plating in 4% paraformaldehyde (PFA) for 15 min at room temperature, and nuclei  
573 stained with 10 $\mu$ g/ml Hoechst 33342 (Thermo Fisher Scientific). In every mixing  
574 experiment, one of the sublines used was fluorescently labelled (e.g. either variant-GFP  
575 mixed with other non-labelled sublines or wild type-RFP mixed with other wild type or

576 variant sublines), thus allowing identification of cell numbers of each of the sublines in  
577 mixed cultures. Imaging of the entire 96 well was performed using the InCell Analyzer  
578 (GE Healthcare) high-content microscopy platform. Quantification of total and  
579 individual subline cell numbers was performed either using custom protocols in  
580 Developer Toolbox 1.7 software (GE Healthcare) or CellProfiler (Carpenter et al.,  
581 2006).

582 For growth curve analysis, cells were plated at  $4,4 \times 10^4$  cells/cm<sup>2</sup> in separate cultures or  
583 co-cultures, with the co-cultures containing 50:50 ratio of different sublines (i.e.  $2,2$   
584  $\times 10^4$  cells/cm<sup>2</sup> of each subline). As an additional control, separate cultures were also  
585 plated containing equivalent numbers of cells from co-cultures (i.e.  $2,2 \times 10^4$  cells/cm<sup>2</sup>  
586 for each subline). Cells were fixed with 4% PFA at different time points post-plating  
587 and the cell numbers analysed as described above.

588 For assessing the effect of increasing ratios of variant cells on wild-type cell growth,  
589 wild type and variant-GFP cells were plated in E8 supplemented with 10 $\mu$ M Y-27632  
590 (Cat. # A11001-10; Geron) at the total number of  $4,4 \times 10^4$  cells/cm<sup>2</sup>, with the ratio of  
591 variant cells varying from 10% to 90% of the total cell number. After the initial 24h  
592 post-plating, cells were washed with DMEM/F12 (Cat. # D6421; Sigma-Aldrich) to  
593 remove the Y-27632 and then grown in E8 for further 3 days. Cells were then fixed  
594 with 4% PFA and the cell numbers analysed as described above.

595 For assessing the effect of increasing cell density on wild-type cell growth, wild type  
596 and variant-GFP cells were plated at a 50:50 ratio, at cell densities increasing from  
597 3,750 to 45,000 cells/cm<sup>2</sup>. After the initial 24h post-plating, cells were washed with  
598 DMEM/F12 (Cat. # D6421; Sigma-Aldrich) to remove the Y-27632 and then grown in  
599 E8 for further 3 days. Four days post-plating, cells were fixed with 4% PFA and the cell  
600 numbers analysed as described above.

601

602 **Time-lapse imaging and analysis**

603 Time-lapse microscopy was performed at 37°C and 5% CO<sub>2</sub> using a Nikon Biostation  
604 CT. Cells were imaged every 10 min for 72 h using 10x or 20x air objective. Image  
605 stacks were compiled in CL Quant (Nikon) and exported to FIJI (Image J) (Schindelin  
606 et al., 2012) for analysis. Lineage trees were constructed manually from FIJI movies.  
607 Individual cells were identified in the first frame and then tracked in each subsequent  
608 frame until their death, division or the end of the movie. The timing of cell death or  
609 division for each cell was noted and then used to reconstruct lineage trees of founder  
610 cells using either TreeGraph 2 (Stover and Muller, 2010) or Interactive Tree Of Life  
611 (iTOL) (Letunic and Bork, 2007) software.

612 **Transwell assay**

613 For indirect co-culture, Millipore Transwell 8.0µm PET membrane inserts (Cat. #  
614 PIEP12R48; Millipore) were used in combination with 24 well plates. Both the insert  
615 and well were coated with vitronectin (VTN-N) (Cat. # A14700, Life Technologies)  
616 diluted to 5 µg/ml in PBS. Cells were harvested using TrypLE (Cat. # 11528856;  
617 Thermo Fisher Scientific) and 1.5x10<sup>4</sup> cells were seeded in the well and insert. Cells  
618 were pre-cultured independently for 24h in E8 medium supplemented with 10µM Y-  
619 27632 (Cat. # A11001-10; Generon) to facilitate cell attachment. 24h post-plating, cells  
620 were washed with DMEM/F12 (Cat. # D6421; Sigma-Aldrich) to remove the Y-27632  
621 and inserts were subsequently placed into appropriate wells with fresh E8 medium.  
622 Medium was changed daily until the end of the experiment when the cells were fixed  
623 with 4% PFA.

624

### 625 **Cell confrontation assay**

626 Cells were harvested using TrypLE (Cat. # 11528856; Thermo Fisher Scientific) and  
627 washed once in DMEM/F12 (Cat. # D6421; Sigma-Aldrich). After counting,  $5 \times 10^4$  cells  
628 were seeded in E8 medium supplemented with  $10 \mu\text{M}$  Y-27632 (Cat. # A11001-10;  
629 Generon) into the inner compartment of two-well silicone inserts (Ibidi 80209). One  
630 day post-plating the silicone inserts were removed, leaving a defined  $500 \mu\text{m}$  gap  
631 between the two cell populations. The cells were then washed with DMEM/F12 (Cat.  
632 # D6421; Sigma-Aldrich) to remove Y-27632 and the medium was replaced with fresh  
633 E8 medium. Cells were fed daily and left to grow for four days until the two opposing  
634 cell fronts had been in contact for approximately 48h. Cells were then fixed with 4%  
635 PFA for 15 min at room temperature, followed by washing in PBS. Cells were  
636 subsequently stained for the apoptotic marker cleaved caspase-3 (Cat. #:9661; Cell  
637 Signaling Technology) and nuclei were counterstained with Hoechst 33342 (Cat. #  
638 H3570; Thermo Fisher Scientific). Images were processed in CellProfiler (Carpenter et  
639 al., 2006) to identify wild-type, wild-type-RFP and variant-GFP cells. Using the nuclei  
640 stain, each cell was assigned a positional identity relative to the border and further  
641 analyzed for positive cleaved caspase-3 signal. Using the positional information of each  
642 cell, figures displaying the location of each cell, as well as cleaved caspase-3 positive  
643 cells were constructed in R (R Project for Statistical Computing; RRID:SCR\_001905).

644

### 645 **Local density analysis**

646 To compute the local density of each cell, the data was processed in the programming  
647 language R. Delaunay triangulation was performed on each image by using the cell

648 nuclei as points for the triangulation. For each cell, the sum of areas of Delaunay  
649 triangles sharing a vertex with the cell of interest was calculated. As this sum is  
650 inversely proportional to the compactness of the cells, local cellular density is taken as  
651 the inverse of this sum. Mathematically, the local density  $\rho$  for each cell is defined as:

$$652 \quad \rho = \sum 1 / A(i) \text{ for } i = 1, \dots, n,$$

653 Where  $n$  is the number of Delaunay triangles that share a vertex with the cell of interest,  
654 and  $A(i)$  is the area of Delaunay triangle  $i$ .

655

### 656 **Immunocytochemistry**

657 Cells were fixed with 4% PFA for 15 min at room temperature, and permeabilised with  
658 either 0.5% Triton-X in Dulbecco's phosphate buffered saline (PBS) for 10 min or 0.2%  
659 Triton-X in PBS for 1h. Cells were then incubated with 1% bovine serum albumin  
660 (BSA) and 0.3% Triton X-100 in PBS. Primary and secondary antibodies, their  
661 suppliers and the dilutions used are listed in the Key Resources Table. Cells were  
662 incubated with primary antibodies either for 1h at room temperature or overnight at 4°C  
663 with gentle agitation on an orbital shaker. Following three washes with PBS, cells were  
664 incubated with an appropriate secondary antibody in PBS supplemented with 1% BSA,  
665 0.3% Triton X-100 and 10µg/ml Hoechst 33342 for 1h at 4°C. Cells were then washed  
666 three times with PBS before imaging. Cells that were prepared for confocal imaging  
667 were grown on glass coverslips and mounted onto slides in 20 µl Vectashield Mounting  
668 Medium (Cat. #: H-1000; Vector Laboratories). Images were captured using the InCell  
669 Analyzer (GE Healthcare) or ZEISS LSM 880 (Carl Zeiss AG, Oberkochen, Germany)  
670 fitted with an Airyscan detection unit.

671

672 **Flow cytometry**

673 Flow cytometry for cleaved caspase-3 was performed to assess levels of apoptotic cells  
674 in cultures. To collect apoptotic cells which had detached from the flask, the old media  
675 was added to a 5ml FACS tube and centrifuged at 270 x g for 5 min. Remaining cells  
676 in the flask were harvested with TrypLE (Cat. # 11528856; Thermo Fisher Scientific)  
677 and added to the FACS tube containing the collected cells from the supernatants of the  
678 same flasks. The collated sample was pelleted and the cell pellet fixed in 4% PFA for  
679 15 min at room temperature. Cells were permeabilised with 0.5% Triton X-100 in PBS  
680 for 5 min at room temperature and then incubated with anti-cleaved caspase-3 primary  
681 antibody (Cat. # 9661; Cell Signalling Technology) in the blocking buffer (1% BSA  
682 and 0.3% Triton X-100 in PBS). Samples were gently agitated for 1h at room  
683 temperature, prior to washing three times in blocking buffer and staining with  
684 secondary antibody (Goat anti-Rabbit AffiniPure IgG+IgM (H+L), Cat. # 111-605-003-  
685 JIR; Stratech) for 1h at room temperature in the dark. Cells were then washed twice  
686 with blocking buffer and analysed on BD FACS Jazz. Baseline fluorescence was set  
687 using secondary antibody-only stained samples.

688 For intracellular analysis of YAP, cells were harvested with TrypLE, permeabilised and  
689 blocked as described above. Cells were incubated with anti-YAP antibody (Cat. # sc-  
690 101199; Santa Cruz Biotechnology) and gently agitated for 1h at room temperature,  
691 prior to washing three times in blocking buffer and staining with secondary antibody  
692 (Goat anti-Mouse AffiniPure IgG+IgM (H+L), Cat. # 115-605-044-JIR; Stratech) for  
693 1h at room temperature in the dark. Cells were then washed twice with blocking buffer  
694 and analysed on BD FACS Jazz. Baseline fluorescence was set using secondary  
695 antibody-only stained samples.

696

## 697 **Cell sorting of individual sublines from co-cultures**

698 After establishing that variant *vIq* cells are losers in co-cultures with variant-GFP cells,  
699 we performed mixing experiments of *vIq* and variant-GFP cells in T75 flasks,  
700 following the same protocol as in 96 well plates. Briefly, cells were plated at  $4.4 \times 10^4$   
701 cells/cm<sup>2</sup> in E8 supplemented with Y-27632 (Cat. # A11001-10; Generon). After 24 h,  
702 Y-27632 was removed and cells were cultured in separate or mixed cultures for another  
703 day. Cells were then harvested using TrypLE (Cat. # 11528856; Thermo Fisher  
704 Scientific) for 4 min at 37°C, washed with DMEM/F12 (Cat. # D6421; Sigma-Aldrich),  
705 counted and resuspended at  $2 \times 10^6$  cells/ml in E8 media. Sorting was performed using  
706 BD FACSJazz cell sorter (BD Biosciences). Sort gates were set using the separate  
707 culture unlabelled *vIq* cells and variant-GFP separate cultures as baseline and positive  
708 gates, respectively. GFP-negative *vIq* and GFP-positive variant-GFP cells were sorted  
709 into collection vessels at  $5 \times 10^5$  cells per sample. Samples were re-analysed post sorting  
710 to establish the purities. In all cases a minimum purity of 98% was achieved. Separate  
711 cultures were also put through the same sorting procedure as co-cultures. Samples were  
712 centrifuged at 270 x g for 3 min, supernatant removed and cell pellets stored at -80°C  
713 prior to RNA or protein extraction. Samples from four independent experiments were  
714 obtained for further analyses.

715

## 716 **RNA extraction, sequencing and bioinformatic analysis**

717 Four biological replicates of *vIq* and variant-GFP cells FACS-sorted from either  
718 separate or mixed cultures were used for RNA extraction and RNAseq analysis. The  
719 RNA was isolated using a Qiagen RNeasy Plus Mini Kit (Cat. # 74134; Qiagen), and  
720 the RNA concentration and purity determined using a Qubit 3.0 Fluorometer (Life

721 Technologies, Carlsbad, USA) and NanoPhotometer (Implen, Munich, Germany),  
722 respectively. The libraries were constructed and sequenced by Novogene (Beijing,  
723 China). Briefly, libraries were prepared using NEBNext Ultra RNA Library Prep Kit  
724 for Illumina (New England Biolabs, Ipswich, USA) and the library preparations were  
725 sequenced on an Illumina HiSeq platform (Illumina, San Diego, USA) to generate 150  
726 bp paired-end reads. The sequencing reads were aligned to a reference human genome  
727 using TopHat v2.0.12. Raw read counts were calculated using the HTSeq v0.6.1 and  
728 were normalized into the fragments per kilobase of transcript per million mapped reads  
729 (FPKM), based on the length of the gene and reads count mapped to it. Differential  
730 gene expression analysis was performed using the DESeq R package (1.18.0). Genes  
731 with the Benjamini and Hochberg's adjusted p value of  $< 0.05$  were considered  
732 differentially expressed. To identify potential signaling pathways within differentially  
733 expressed genes, KEGG enrichment analysis of differentially expressed genes was  
734 performed using the PANTHER v14 software (Mi et al., 2019). The resulting list was  
735 refined using REVIGO (Supek et al., 2011) to remove redundant GO terms.

736

### 737 **Western blotting**

738 Cells were lysed in 1x Laemmli Buffer pre-warmed to 95°C and the total protein  
739 concentration was normalised using the Pierce BCA Protein Assay (Cat. # 23250;  
740 ThermoFisher Scientific). Proteins (10µg/sample) were resolved by SDS-PAGE and  
741 were run alongside a Page Ruler prestained protein ladder (Cat. # 26616; ThermoFisher  
742 Scientific). Proteins were then transferred onto a PVDF membrane (Cat. # IPVH00010;  
743 Millipore) using an Electrophoresis Transfer Cell (Bio-Rad). The membrane was  
744 blocked in 5% milk for one hour, washed three times with TBS-T (50 mM Tris-HCl  
745 (pH 7.5), 150 mM NaCl, 0.1% (v/v) Tween 20) and then incubated with primary



746 antibodies for MCL-1 (Cat. # 5453; Cell Signalling Technology) at 1: 1,000 dilution,  
747 BCL-XL (Cat. # 2764; Cell Signalling Technology) at 1:1,000 dilution, BCL2 (Cat. #  
748 2870; Cell Signalling Technology) at 1: 1,000 or  $\beta$ -ACTIN (Cat. #66009-1-Ig;  
749 Proteintech) at 1:5,000 dilution. Following three washes with TBS-T, the membrane  
750 was incubated with secondary antibody (either Anti-Rabbit IgG (H+L), HRP conjugate  
751 Cat. # W4011; Promega at 1:4,000 dilution or Anti-Mouse IgG (H+L), HRP conjugate  
752 Cat. # W4021; Promega at 1: 4,000 dilution) for 1h. After three washes,  
753 immunoreactivity was visualised using ECL Prime detection kit (Cat. # RPN2232, GE  
754 Healthcare) and signal captured on a CCD-based camera (Syngene).

755

#### 756 **YAP overexpression**

757 The pCAG-YAP expression vector was established by inserting a YAP-T2A-mCherry  
758 sequence into the pCAGeGFP vector (Liew et al., 2007). In brief, pGAMA-YAP, a gift  
759 from Miguel Ramalho-Santos (Cat. # 74942; Addgene) (Qin et al., 2016), was obtained  
760 from Addgene. Single digests were performed on the pGAMA-YAP and pCAGeGFP  
761 vectors using EcoRI (Cat. # 0101, New England Biolabs) and NotI (Cat. # 0189, New  
762 England Biolabs) restriction sites, respectively, to linearize plasmids. The cohesive  
763 ends were blunted using T4 DNA polymerase (Cat. # M0203, New England Biolabs)  
764 and vectors subsequently digested at the NheI restriction site to produce single cohesive  
765 ends. The YAP-T2A-mCherry sequence was obtained by gel extraction (Cat. # 740609,  
766 Machery-Nagel) and inserted into the pCAGeGFP using ligation reaction (Cat. #  
767 M0202, New England Biolabs) to produce the pCAG-YAP expression vector. To  
768 generate the wild-type YAP overexpressing line, cells were transfected using the Neon  
769 Transfection System (Cat. # MPK10025; Thermo Fisher Scientific). Wild-type H7 cells  
770 were dissociated to single cells using TrypLE as described above and resuspended at

771 2,0 x10<sup>4</sup> cells/ml in “R buffer”. Transfection was performed with 5µg of plasmid DNA  
772 using 1 pulse of 1600V, 20msec width. After electroporation, the cells were  
773 immediately transferred to a vitronectin coated 60mm diameter culture dish (Cat. #  
774 150288; Thermo Fisher Scientific) containing E8 media supplemented with 10µM Y-  
775 27632 (Cat. # A11001-10; Generon). To select for stably transfected cells, 48h post  
776 transfection cells were subjected to puromycin (Cat. # A11138; Thermo Fisher  
777 Scientific) drug selection. Individual colonies of resistant cells appeared after 1-2 weeks  
778 and were handpicked by micropipette, and transferred into a 12-well culture plate. The  
779 cells were then expanded in the presence of puromycin selection and subsequently  
780 frozen to establish cell banks. At the time of freezing, sister flasks were sent for  
781 karyotyping by G-banding and assessment of the relative copy number of commonly  
782 identified genetic changes by qPCR, as described above. Upon defrosting and  
783 subsequent culture, cells were also regularly genotyped by karyotyping and screened  
784 for common genetic changes by quantitative PCR, as described above.

785

#### 786 **Generation of wild-type-RFP cell line**

787 To generate the wild-type-RFP line, karyotypically diploid H7 subline was transfected  
788 with pCAG-H2B-RFP plasmid (a kind gift from Dr Jie Na, Tsinghua University,  
789 Beijing) using the 4D nucleofector (Lonza) in the “P3 Primary Cell solution” as per the  
790 manufacturer’s instructions. Cells were pulsed using the CB-150 pulse code, optimised  
791 for hPSCs. Cells were then plated into flasks coated with Geltrex (Cat. # A1413202;  
792 ThermoFisher Scientific) in mTESR1 medium (Cat. # 85850; STEMCELL  
793 Technologies) supplemented with 10µM Y-27632 (Cat. # A11001-10; Generon). After  
794 two days, the stably transfected cells were selected by selection with puromycin (Cat.  
795 # A11138; Thermo Fisher Scientific). Resistant colonies were manually picked and

796 expanded. Clonal lines were then screened for their RFP expression levels by  
797 fluorescent imaging. The chosen clone was karyotyped by G-banding and screened for  
798 common genetic changes by quantitative PCR prior to freezing and at regular intervals  
799 (~5 passages) upon subsequent culture.

800

### 801 **Treatment of hPSCs with cytoskeletal inhibitors**

802 HPSCs were treated with either 10  $\mu$ M nocodazole (Cat. #487928; VWR International),  
803 or 10  $\mu$ M Y-27632 (Cat. # A11001-10; Generon) for 3h or 0.5  $\mu$ M latrunculin A (Cat.  
804 # 10010630-25ug-CAY; Cambridge Bioscience) or 0.5  $\mu$ M cytochalasin B (Cat. #  
805 C2743-200UL; Sigma-Aldrich) for 1h. DMSO was used as vehicle control for  
806 nocodazole, cytochalasin B and Y-27632, whereas ethanol was used as vehicle control  
807 for latrunculin B. Cells were fixed with 4% PFA for 15 min at room temperature,  
808 washed in PBS and processed for immunocytochemistry as detailed above.

809

### 810 **QUANTIFICATION AND STATISTICAL ANALYSIS**

811 Statistical analysis of the data presented was performed using GraphPad Prism version  
812 7.00, GraphPad Software, La Jolla California USA, [www.graphpad.com](http://www.graphpad.com). Differences  
813 were tested by statistical tests including Student's *t* test or one-way ANOVA, as  
814 indicated in figure legends.

815

816

### 817 **SUPPLEMENTAL INFORMATION**

818 Supplemental Information includes 8 figures and 4 videos.

819

### 820 **AUTHOR CONTRIBUTIONS**

821 Conceived and designed the experiments: IB, TAR, CJP. Performed the experiments:  
822 CJP, IB, DS, JL. Analyzed the data: CJP, DS, PJG, IB, SS. Wrote the paper: IB, CJP,  
823 PJG, TAR.

824

## 825 **ACKNOWLEDGMENTS**

826 We thank Sheffield Genetics Diagnostics Service for karyotype and Fluorescent In Situ  
827 Hybridisation analyses. This work was supported by the Medical Research Council  
828 MR/N009371/1 and the UK Regenerative Medicine Platform, MRC reference  
829 MR/R015724/1.

830

## 831 References

- 832 Andrews, P.W., Ben-David, U., Benvenisty, N., Coffey, P., Eggen, K., Knowles, B.B.,  
833 Nagy, A., Pera, M., Reubinoff, B., Rugg-Gunn, P.J., *et al.* (2017). Assessing the Safety  
834 of Human Pluripotent Stem Cells and Their Derivatives for Clinical Applications. *Stem*  
835 *Cell Reports* 9, 1-4.
- 836 Andrews, P.W., Matin, M.M., Bahrami, A.R., Damjanov, I., Gokhale, P., and Draper,  
837 J.S. (2005). Embryonic stem (ES) cells and embryonal carcinoma (EC) cells: opposite  
838 sides of the same coin. *Biochem Soc Trans* 33, 1526-1530.
- 839 Aragona, M., Panciera, T., Manfrin, A., Giulitti, S., Michielin, F., Elvassore, N.,  
840 Dupont, S., and Piccolo, S. (2013). A mechanical checkpoint controls multicellular  
841 growth through YAP/TAZ regulation by actin-processing factors. *Cell* 154, 1047-1059.
- 842 Avery, S., Hirst, A.J., Baker, D., Lim, C.Y., Alagaratnam, S., Skotheim, R.I., Lothe,  
843 R.A., Pera, M.F., Colman, A., Robson, P., *et al.* (2013). BCL-XL mediates the strong  
844 selective advantage of a 20q11.21 amplification commonly found in human embryonic  
845 stem cell cultures. *Stem Cell Reports* 1, 379-386.
- 846 Avior, Y., Eggen, K., and Benvenisty, N. (2019). Cancer-Related Mutations Identified  
847 in Primed and Naive Human Pluripotent Stem Cells. *Cell Stem Cell* 25, 456-461.
- 848 Baker, D., Hirst, A.J., Gokhale, P.J., Juarez, M.A., Williams, S., Wheeler, M., Bean,  
849 K., Allison, T.F., Moore, H.D., Andrews, P.W., *et al.* (2016). Detecting Genetic  
850 Mosaicism in Cultures of Human Pluripotent Stem Cells. *Stem Cell Reports* 7, 998-  
851 1012.
- 852 Baker, D.E., Harrison, N.J., Maltby, E., Smith, K., Moore, H.D., Shaw, P.J., Heath,  
853 P.R., Holden, H., and Andrews, P.W. (2007). Adaptation to culture of human  
854 embryonic stem cells and oncogenesis in vivo. *Nat Biotechnol* 25, 207-215.
- 855 Barbaric, I., Biga, V., Gokhale, P.J., Jones, M., Stavish, D., Glen, A., Coca, D., and  
856 Andrews, P.W. (2014). Time-lapse analysis of human embryonic stem cells reveals  
857 multiple bottlenecks restricting colony formation and their relief upon culture  
858 adaptation. *Stem Cell Reports* 3, 142-155.
- 859 Ben-David, U., Arad, G., Weissbein, U., Mandefro, B., Maimon, A., Golan-Lev, T.,  
860 Narwani, K., Clark, A.T., Andrews, P.W., Benvenisty, N., *et al.* (2014). Aneuploidy  
861 induces profound changes in gene expression, proliferation and tumorigenicity of  
862 human pluripotent stem cells. *Nat Commun* 5, 4825.
- 863 Bondar, T., and Medzhitov, R. (2010). p53-mediated hematopoietic stem and  
864 progenitor cell competition. *Cell Stem Cell* 6, 309-322.
- 865 Bowling, S., Lawlor, K., and Rodriguez, T.A. (2019). Cell competition: the winners  
866 and losers of fitness selection. *Development* 146.
- 867 Boyden, S. (1962). The chemotactic effect of mixtures of antibody and antigen on  
868 polymorphonuclear leucocytes. *J Exp Med* 115, 453-466.
- 869 Bras-Pereira, C., and Moreno, E. (2018). Mechanical cell competition. *Curr Opin Cell*  
870 *Biol* 51, 15-21.
- 871 Brumby, A.M., and Richardson, H.E. (2003). scribble mutants cooperate with  
872 oncogenic Ras or Notch to cause neoplastic overgrowth in *Drosophila*. *EMBO J* 22,  
873 5769-5779.
- 874 Burke, R., and Basler, K. (1996). Dpp receptors are autonomously required for cell  
875 proliferation in the entire developing *Drosophila* wing. *Development* 122, 2261-2269.
- 876 Codelia, V.A., Sun, G., and Irvine, K.D. (2014). Regulation of YAP by mechanical  
877 strain through Jnk and Hippo signaling. *Curr Biol* 24, 2012-2017.
- 878 de la Cova, C., Abril, M., Bellosta, P., Gallant, P., and Johnston, L.A. (2004).  
879 *Drosophila myc* regulates organ size by inducing cell competition. *Cell* 117, 107-116.

880 Draper, J.S., Smith, K., Gokhale, P., Moore, H.D., Maltby, E., Johnson, J., Meisner, L.,  
881 Zwaka, T.P., Thomson, J.A., and Andrews, P.W. (2004). Recurrent gain of  
882 chromosomes 17q and 12 in cultured human embryonic stem cells. *Nat Biotechnol* 22,  
883 53-54.

884 Dupont, S., Morsut, L., Aragona, M., Enzo, E., Giulitti, S., Cordenonsi, M., Zanconato,  
885 F., Le Digabel, J., Forcato, M., Bicciato, S., *et al.* (2011). Role of YAP/TAZ in  
886 mechanotransduction. *Nature* 474, 179-183.

887 Eichenlaub, T., Cohen, S.M., and Herranz, H. (2016). Cell Competition Drives the  
888 Formation of Metastatic Tumors in a *Drosophila* Model of Epithelial Tumor Formation.  
889 *Curr Biol* 26, 419-427.

890 Enver, T., Soneji, S., Joshi, C., Brown, J., Iborra, F., Orntoft, T., Thykjaer, T., Maltby,  
891 E., Smith, K., Abu Dawud, R., *et al.* (2005). Cellular differentiation hierarchies in  
892 normal and culture-adapted human embryonic stem cells. *Hum Mol Genet* 14, 3129-  
893 3140.

894 Fox, V., Gokhale, P.J., Walsh, J.R., Matin, M., Jones, M., and Andrews, P.W. (2008).  
895 Cell-cell signaling through NOTCH regulates human embryonic stem cell proliferation.  
896 *Stem Cells* 26, 715-723.

897 Furukawa, K.T., Yamashita, K., Sakurai, N., and Ohno, S. (2017). The Epithelial  
898 Circumferential Actin Belt Regulates YAP/TAZ through Nucleocytoplasmic Shuttling  
899 of Merlin. *Cell Rep* 20, 1435-1447.

900 Harrison, N.J., Baker, D., and Andrews, P.W. (2007). Culture adaptation of embryonic  
901 stem cells echoes germ cell malignancy. *Int J Androl* 30, 275-281; discussion 281.

902 Harvey, K.F., Zhang, X., and Thomas, D.M. (2013). The Hippo pathway and human  
903 cancer. *Nat Rev Cancer* 13, 246-257.

904 Hashimoto, M., and Sasaki, H. (2019). Epiblast Formation by TEAD-YAP-Dependent  
905 Expression of Pluripotency Factors and Competitive Elimination of Unspecified Cells.  
906 *Dev Cell* 50, 139-154 e135.

907 International Stem Cell, I., Amps, K., Andrews, P.W., Anyfantis, G., Armstrong, L.,  
908 Avery, S., Baharvand, H., Baker, J., Baker, D., Munoz, M.B., *et al.* (2011). Screening  
909 ethnically diverse human embryonic stem cells identifies a chromosome 20 minimal  
910 amplicon conferring growth advantage. *Nat Biotechnol* 29, 1132-1144.

911 Jacobs, K., Zambelli, F., Mertzaniidou, A., Smolders, I., Geens, M., Nguyen, H.T.,  
912 Barbe, L., Sermon, K., and Spits, C. (2016). Higher-Density Culture in Human  
913 Embryonic Stem Cells Results in DNA Damage and Genome Instability. *Stem Cell*  
914 *Reports* 6, 330-341.

915 Johnston, L.A. (2014). Socializing with MYC: cell competition in development and as  
916 a model for premalignant cancer. *Cold Spring Harb Perspect Med* 4, a014274.

917 Kanehisa, M., Goto, S., Furumichi, M., Tanabe, M., and Hiraakawa, M. (2010). KEGG  
918 for representation and analysis of molecular networks involving diseases and drugs.  
919 *Nucleic Acids Res* 38, D355-360.

920 Levayer, R., Dupont, C., and Moreno, E. (2016). Tissue Crowding Induces Caspase-  
921 Dependent Competition for Space. *Curr Biol* 26, 670-677.

922 Liu, Z., Yee, P.P., Wei, Y., Liu, Z., Kawasawa, Y.I., and Li, W. (2019). Differential  
923 YAP expression in glioma cells induces cell competition and promotes tumorigenesis.  
924 *J Cell Sci* 132.

925 Mamada, H., Sato, T., Ota, M., and Sasaki, H. (2015). Cell competition in mouse  
926 NIH3T3 embryonic fibroblasts is controlled by the activity of Tead family proteins and  
927 Myc. *J Cell Sci* 128, 790-803.

- 928 Moitrier, S., Blanch-Mercader, C., Garcia, S., Sliogeryte, K., Martin, T., Camonis, J.,  
929 Marcq, P., Silberzan, P., and Bonnet, I. (2019). Collective stresses drive competition  
930 between monolayers of normal and Ras-transformed cells. *Soft Matter* *15*, 537-545.
- 931 Morata, G., and Ripoll, P. (1975). Minutes: mutants of drosophila autonomously  
932 affecting cell division rate. *Dev Biol* *42*, 211-221.
- 933 Moreno, E., and Basler, K. (2004). dMyc transforms cells into super-competitors. *Cell*  
934 *117*, 117-129.
- 935 Moreno, E., Basler, K., and Morata, G. (2002). Cells compete for decapentaplegic  
936 survival factor to prevent apoptosis in Drosophila wing development. *Nature* *416*, 755-  
937 759.
- 938 Nguyen, H.T., Geens, M., Mertzaniidou, A., Jacobs, K., Heirman, C., Breckpot, K., and  
939 Spits, C. (2014). Gain of 20q11.21 in human embryonic stem cells improves cell  
940 survival by increased expression of Bcl-xL. *Mol Hum Reprod* *20*, 168-177.
- 941 Nishioka, N., Inoue, K., Adachi, K., Kiyonari, H., Ota, M., Ralston, A., Yabuta, N.,  
942 Hirahara, S., Stephenson, R.O., Ogonuki, N., *et al.* (2009). The Hippo signaling  
943 pathway components Lats and Yap pattern Tead4 activity to distinguish mouse  
944 trophoctoderm from inner cell mass. *Dev Cell* *16*, 398-410.
- 945 Olariu, V., Harrison, N.J., Coca, D., Gokhale, P.J., Baker, D., Billings, S.,  
946 Kadirkamanathan, V., and Andrews, P.W. (2010). Modeling the evolution of culture-  
947 adapted human embryonic stem cells. *Stem Cell Res* *4*, 50-56.
- 948 Panciera, T., Azzolin, L., Cordenonsi, M., and Piccolo, S. (2017). Mechanobiology of  
949 YAP and TAZ in physiology and disease. *Nat Rev Mol Cell Biol* *18*, 758-770.
- 950 Porazinski, S., de Navascues, J., Yako, Y., Hill, W., Jones, M.R., Maddison, R., Fujita,  
951 Y., and Hogan, C. (2016). EphA2 Drives the Segregation of Ras-Transformed  
952 Epithelial Cells from Normal Neighbors. *Curr Biol* *26*, 3220-3229.
- 953 Sancho, M., Di-Gregorio, A., George, N., Pozzi, S., Sanchez, J.M., Pernaute, B., and  
954 Rodriguez, T.A. (2013). Competitive interactions eliminate unfit embryonic stem cells  
955 at the onset of differentiation. *Dev Cell* *26*, 19-30.
- 956 Suijkerbuijk, S.J., Kolahgar, G., Kucinski, I., and Piddini, E. (2016). Cell Competition  
957 Drives the Growth of Intestinal Adenomas in Drosophila. *Curr Biol* *26*, 428-438.
- 958 Thomson, J.A., Itskovitz-Eldor, J., Shapiro, S.S., Waknitz, M.A., Swiergiel, J.J.,  
959 Marshall, V.S., and Jones, J.M. (1998). Embryonic stem cell lines derived from human  
960 blastocysts. *Science* *282*, 1145-1147.
- 961 Totaro, A., Panciera, T., and Piccolo, S. (2018). YAP/TAZ upstream signals and  
962 downstream responses. *Nat Cell Biol* *20*, 888-899.
- 963 Valon, L., and Levayer, R. (2019). Dying under pressure: cellular characterisation and  
964 in vivo functions of cell death induced by compaction. *Biol Cell* *111*, 51-66.
- 965 Wada, K., Itoga, K., Okano, T., Yonemura, S., and Sasaki, H. (2011). Hippo pathway  
966 regulation by cell morphology and stress fibers. *Development* *138*, 3907-3914.
- 967 Wagstaff, L., Goschorska, M., Kozyrska, K., Duclos, G., Kucinski, I., Chessel, A.,  
968 Hampton-O'Neil, L., Bradshaw, C.R., Allen, G.E., Rawlins, E.L., *et al.* (2016).  
969 Mechanical cell competition kills cells via induction of lethal p53 levels. *Nat Commun*  
970 *7*, 11373.
- 971 Zanconato, F., Cordenonsi, M., and Piccolo, S. (2016). YAP/TAZ at the Roots of  
972 Cancer. *Cancer Cell* *29*, 783-803.
- 973 Zhao, B., Wei, X., Li, W., Udan, R.S., Yang, Q., Kim, J., Xie, J., Ikenoue, T., Yu, J.,  
974 Li, L., *et al.* (2007). Inactivation of YAP oncoprotein by the Hippo pathway is involved  
975 in cell contact inhibition and tissue growth control. *Genes Dev* *21*, 2747-2761.

976 Zhao, B., Ye, X., Yu, J., Li, L., Li, W., Li, S., Yu, J., Lin, J.D., Wang, C.Y., Chinnaiyan,  
977 A.M., *et al.* (2008). TEAD mediates YAP-dependent gene induction and growth  
978 control. *Genes Dev* 22, 1962-1971.

979



## 980 **Figures**

### 981 **Figure 1. Wild-type cells are eliminated by apoptosis from co-cultures with variant** 982 **hPSCs.**

- 983 A) Growth curves of wild-type-RFP and variant-GFP cells grown separately.  
984 B) Growth curves of wild-type-RFP and variant-GFP cells grown in co-culture.  
985 C) Representative images of wild-type-RFP hPSCs (red) grown separately (upper  
986 panels) or in co-culture with variant-GFP hPSCs (green) (lower panels). Scale  
987 bar: 50 $\mu$ m.  
988 D) Ratio of variant-GFP/wild-type-RFP cells in separate versus co-culture  
989 conditions. ‘Separate culture’ ratio was calculated by dividing the number of  
990 variant-GFP cells in separate culture with a number of wild-type-RFP cells in  
991 separate culture. ‘Co-culture’ ratio was obtained by directly counting the number  
992 of either wild-type-RFP or variant-GFP cells in co-culture using high-content  
993 microscopy and dividing by the total cell count.  
994 E) Percentage of cells positive for cleaved caspase-3 indicator of apoptosis in wild-  
995 type and variant-GFP cells in separate culture or upon co-culture.  
996 Data represents the mean of three independent experiments  $\pm$  SD. n.s. non-significant;  
997 \*\*\*  $p < 0.001$ ; \*\*\*\*  $p < 0.0001$ , Student’s *t* test.  
998

### 999 **Figure 2. Cell competition in hPSC cultures is cell-contact mediated.**

- 1000 A) Percentage of caspase-3 positive cells upon Transwell cultures of different  
1001 sublines. Results are the mean of three independent experiments  $\pm$  SD; n.s. non-  
1002 significant, Student’s *t* test.  
1003 B) Effect of increasing the ratio of variant-GFP cells in co-cultures with wild-type  
1004 cells on the numbers of wild-type cells at day 3 of cell competition assay. Results  
1005 are the mean of three independent experiments  $\pm$  SD.  
1006 C) Effect of increasing plating cell density on the numbers of wild-type cells. Results  
1007 are the mean of three independent experiments  $\pm$  SD. \*\*  $p < 0.01$ , Student’s *t* test.  
1008 D) Cell confrontation assay of wild-type-RFP and variant-GFP cells at 48h post-  
1009 contact. Top panel: nuclei of wild-type-RFP and variant-GFP cells represented as  
1010 blue and green dots, respectively. Middle panel: cleaved caspase-3 positive cells  
1011 represented as purple dots. Bottom panel: percentage of cleaved caspase-3  
1012 positive cells calculated as the number of cleaved caspase 3-positive cells in the  
1013 total cell number within a defined area of a cell insert. The width of the bar  
1014 corresponds to the analysed area of the insert shown in the middle panel above.  
1015 E) Cell confrontation assay of wild-type and wild-type-RFP cells at 48h post-  
1016 contact. Top panel: nuclei of wild-type and wild-type-RFP cells represented as  
1017 blue and red dots, respectively. Middle panel: cleaved caspase-3 signal,  
1018 represented as purple dots. Bottom panel: percentage of cleaved caspase-3  
1019 positive cells calculated as the number of cleaved caspase 3-positive cells in the  
1020 total cell number within a defined area of a cell insert. The width of the bar  
1021 corresponds to the analysed area of the insert in the middle panel above.  
1022 F) Frozen frames from the time-lapse videos of cell confrontation assay of wild-  
1023 type-RFP (red) and variant-GFP (green) cells. Left panel: inserts at 4h before  
1024 contact; middle panel: inserts at the time when cells first come into contact  
1025 (denoted as 0h); right panel: inserts at 48h post-contact. Dashed white line

- 1026 indicates the position on the insert where the two different populations first meet  
1027 at 0h time point.  
1028 G) Frozen frames from the time-lapse videos of cell confrontation assay of wild-type  
1029 and wild-type-RFP (red) cells. Left panel: inserts at 4h before contact; middle  
1030 panel: inserts at the time when cells first come into contact (denoted as 0h); right  
1031 panel: inserts at 48h post-contact. Dashed white line indicates the position on the  
1032 insert where the two different populations first meet at 0h time point.  
1033 H) Corralling of wild-type cells by variant-GFP counterparts. The outlined areas in  
1034 the middle and right panels indicate regions of co-culture harbouring wild-type  
1035 cells. Nuclei are counterstained with Hoechst 33342.  
1036 I) Cell density of wild-type and variant-GFP cells grown either separately or in co-  
1037 cultures calculated by using the nuclei of each cell as individual points to  
1038 construct a Delaunay triangulation. Local density was calculated by summing the  
1039 areas of Delaunay triangles sharing a vertex with the cell of interest, then taking  
1040 the inverse of this sum. Data are the values of individual cells from 3 independent  
1041 experiments. \*\*\*\*  $p < 0.0001$ , one-way ANOVA.  
1042

1043 **Figure 3. The winner phenotype is dependent on higher proliferative rates of**  
1044 **variant cells.**

- 1045 A) Growth curves of wild-type-RFP and *v1q* cells grown separately.  
1046 B) Growth curves of wild-type-RFP and *v1q* cells grown in co-culture.  
1047 C) Growth curves of *v1q* and variant-GFP cells grown separately.  
1048 D) Growth curves of *v1q* and variant-GFP cells grown in co-culture.  
1049 E) Ratio of variant-GFP/*v1q* cells in separate versus co-culture conditions. ‘Separate  
1050 culture’ ratio was calculated by dividing the number of variant-GFP cells in separate  
1051 culture with a number of *v1q* cells in separate culture. ‘Co-culture’ ratio was  
1052 obtained by directly counting the number of either *v1q* or variant-GFP cells in co-  
1053 culture using high-content microscopy and dividing by the total cell count.  
1054 F) Percentage of cells positive for cleaved caspase-3 indicator of apoptosis in *v1q* and  
1055 variant-GFP cells in separate culture or upon co-culture.  
1056 A-E: Data are the mean of two independent experiments  $\pm$  SD; F: Results are the mean  
1057 of three independent experiments  $\pm$  SD. n.s. non-significant; \*  $p < 0.05$ ; \*\*  $p < 0.01$ ; \*\*\*\*  
1058  $p < 0.0001$ , Student’s *t* test.  
1059  
1060

1061 **Figure 4. Gene expression analysis of winner and loser cells indicates Hippo**  
1062 **signalling as a mediator of cell competition in hPSC cultures.**

- 1063 A) Schematic depicting the sorting of loser (*v1q*) and winner (variant-GFP) cells from  
1064 separate or co-culture conditions to obtain the following populations: ‘loser  
1065 separate’, ‘winner separate’, ‘loser co-culture’ and ‘winner co-culture’. Four  
1066 biological replicates of each sample were obtained from independent experiments.  
1067 B) Unsupervised hierarchical clustering of the winner and loser cells from separate and  
1068 co-culture based on the differentially expressed genes.  
1069 C) Volcano plot of the differentially expressed genes between winner and loser hPSCs  
1070 in separate cultures. Downregulated genes (green) are positioned on the left of the  
1071 plot and upregulated genes (red) are on the right of the plot.

- 1072 D) KEGG pathway analysis of the downregulated genes in winner versus loser hPSCs  
1073 in separate cultures showing the molecular pathways with a corrected p-value >0.25  
1074 threshold.  
1075 E) Volcano plot of the differentially expressed genes between winner and loser hPSCs  
1076 in co-culture. Downregulated genes (green) are positioned on the left of the plot and  
1077 upregulated gene (red) are on the right of the plot.  
1078 F) KEGG pathway analysis of the downregulated genes in winner versus loser hPSCs  
1079 in co-culture showing the molecular pathways with a corrected p-value >0.25  
1080 threshold.  
1081 G) Immunocytochemistry staining for YAP (red) in wild-type and variant-GFP cells  
1082 (green) in separate cultures and upon co-culturing revealed cytoplasmic localisation  
1083 of YAP in crowded wild-type cells upon co-culture. Nuclei are counterstained with  
1084 Hoechst 33342. Scale bar: 25µm.  
1085

1086 **Figure 5. YAP overexpression alleviates the loser cell phenotype in wild-type cells.**

- 1087 A) YAP overexpression leads to improved growth of wild-type cells.  
1088 B) YAP overexpressing cells assume the winner phenotype in co-cultures with wild-  
1089 type cells.  
1090 C) YAP overexpression in wild-type cells confers increased resistance to cell crowding  
1091 in co-cultures with variant-GFP cells.  
1092 Data are the mean of three independent experiments ± SD. n.s. non-significant; \*p<  
1093 0.05; \*\*p<0.01; \*\*\*p<0.001; Student's *t* test.  
1094

1095 **Figure 6. Crowded wild-type cells display prominent actin adhesion belt and**  
1096 **cytoplasmic YAP localisation.**

- 1097 A) Schematic representation of the adhesion belt and basal planes in confocal imaging  
1098 of co-cultured cells (upper panel). Corresponding adhesion belt and basal planes of  
1099 co-cultured cells stained for F-actin and YAP are shown in the panels below. Closed  
1100 arrowheads point to wild-type cells displaying YAP localised within the cytoplasm  
1101 and having a prominent staining of adhesion belt F-actin. Open arrows point to  
1102 neighbouring variant-GFP cells displaying nuclear localisation of YAP and no  
1103 prominent adhesion belt.  
1104 B) Phosphorylated YAP (p-YAP) localisation and myosin IIB staining in co-cultured  
1105 wild-type and variant-GFP cells taken at the plane of the adhesion belt. Closed  
1106 arrowheads point to wild-type cells displaying increased p-YAP localised within  
1107 the cytoplasm and having prominent staining of myosin IIB. Open arrows point to  
1108 neighbouring variant-GFP cells displaying weaker phosphorylated YAP staining  
1109 and less prominent myosin IIB staining.  
1110 C) YAP and p-YAP staining in co-cultured wild-type and variant-GFP cells taken at  
1111 the plane of the adhesion belt. Closed arrowheads point to wild-type cells displaying  
1112 increased p-YAP localised in the cytoplasm.  
1113 Scale bars: 10µm.  
1114

1115 **Figure 7. YAP localisation is regulated by adhesion belt actin in hPSCs.**

- 1116 A) Localisation of YAP in co-cultured wild-type and variant-GFP cells treated with  
1117 nocodazole. Closed arrowheads point to wild-type cells displaying YAP localised  
1118 within the cytoplasm and having prominent staining of α-tubulin. Nocodazole

1119 treatment perturbed the microtubule structure and caused diffuse localisation of  
1120 YAP in wild-type cells (open arrows).  
1121 B) Disruption of F-actin in the adhesion belt of co-cultured wild-type and variant-GFP  
1122 cells treated with latrunculin A or cytochalasin B resulted in the diffuse YAP  
1123 localisation.  
1124 C) Treatment of co-cultures with Y-27632 affected the stress fibers at the basal plane,  
1125 but did not disrupt the actin in the adhesion belt. Y-27632 had no impact on the  
1126 YAP localisation in the crowded wild-type cells.  
1127 Scale bars: 10 $\mu$ m.

# Figure 1

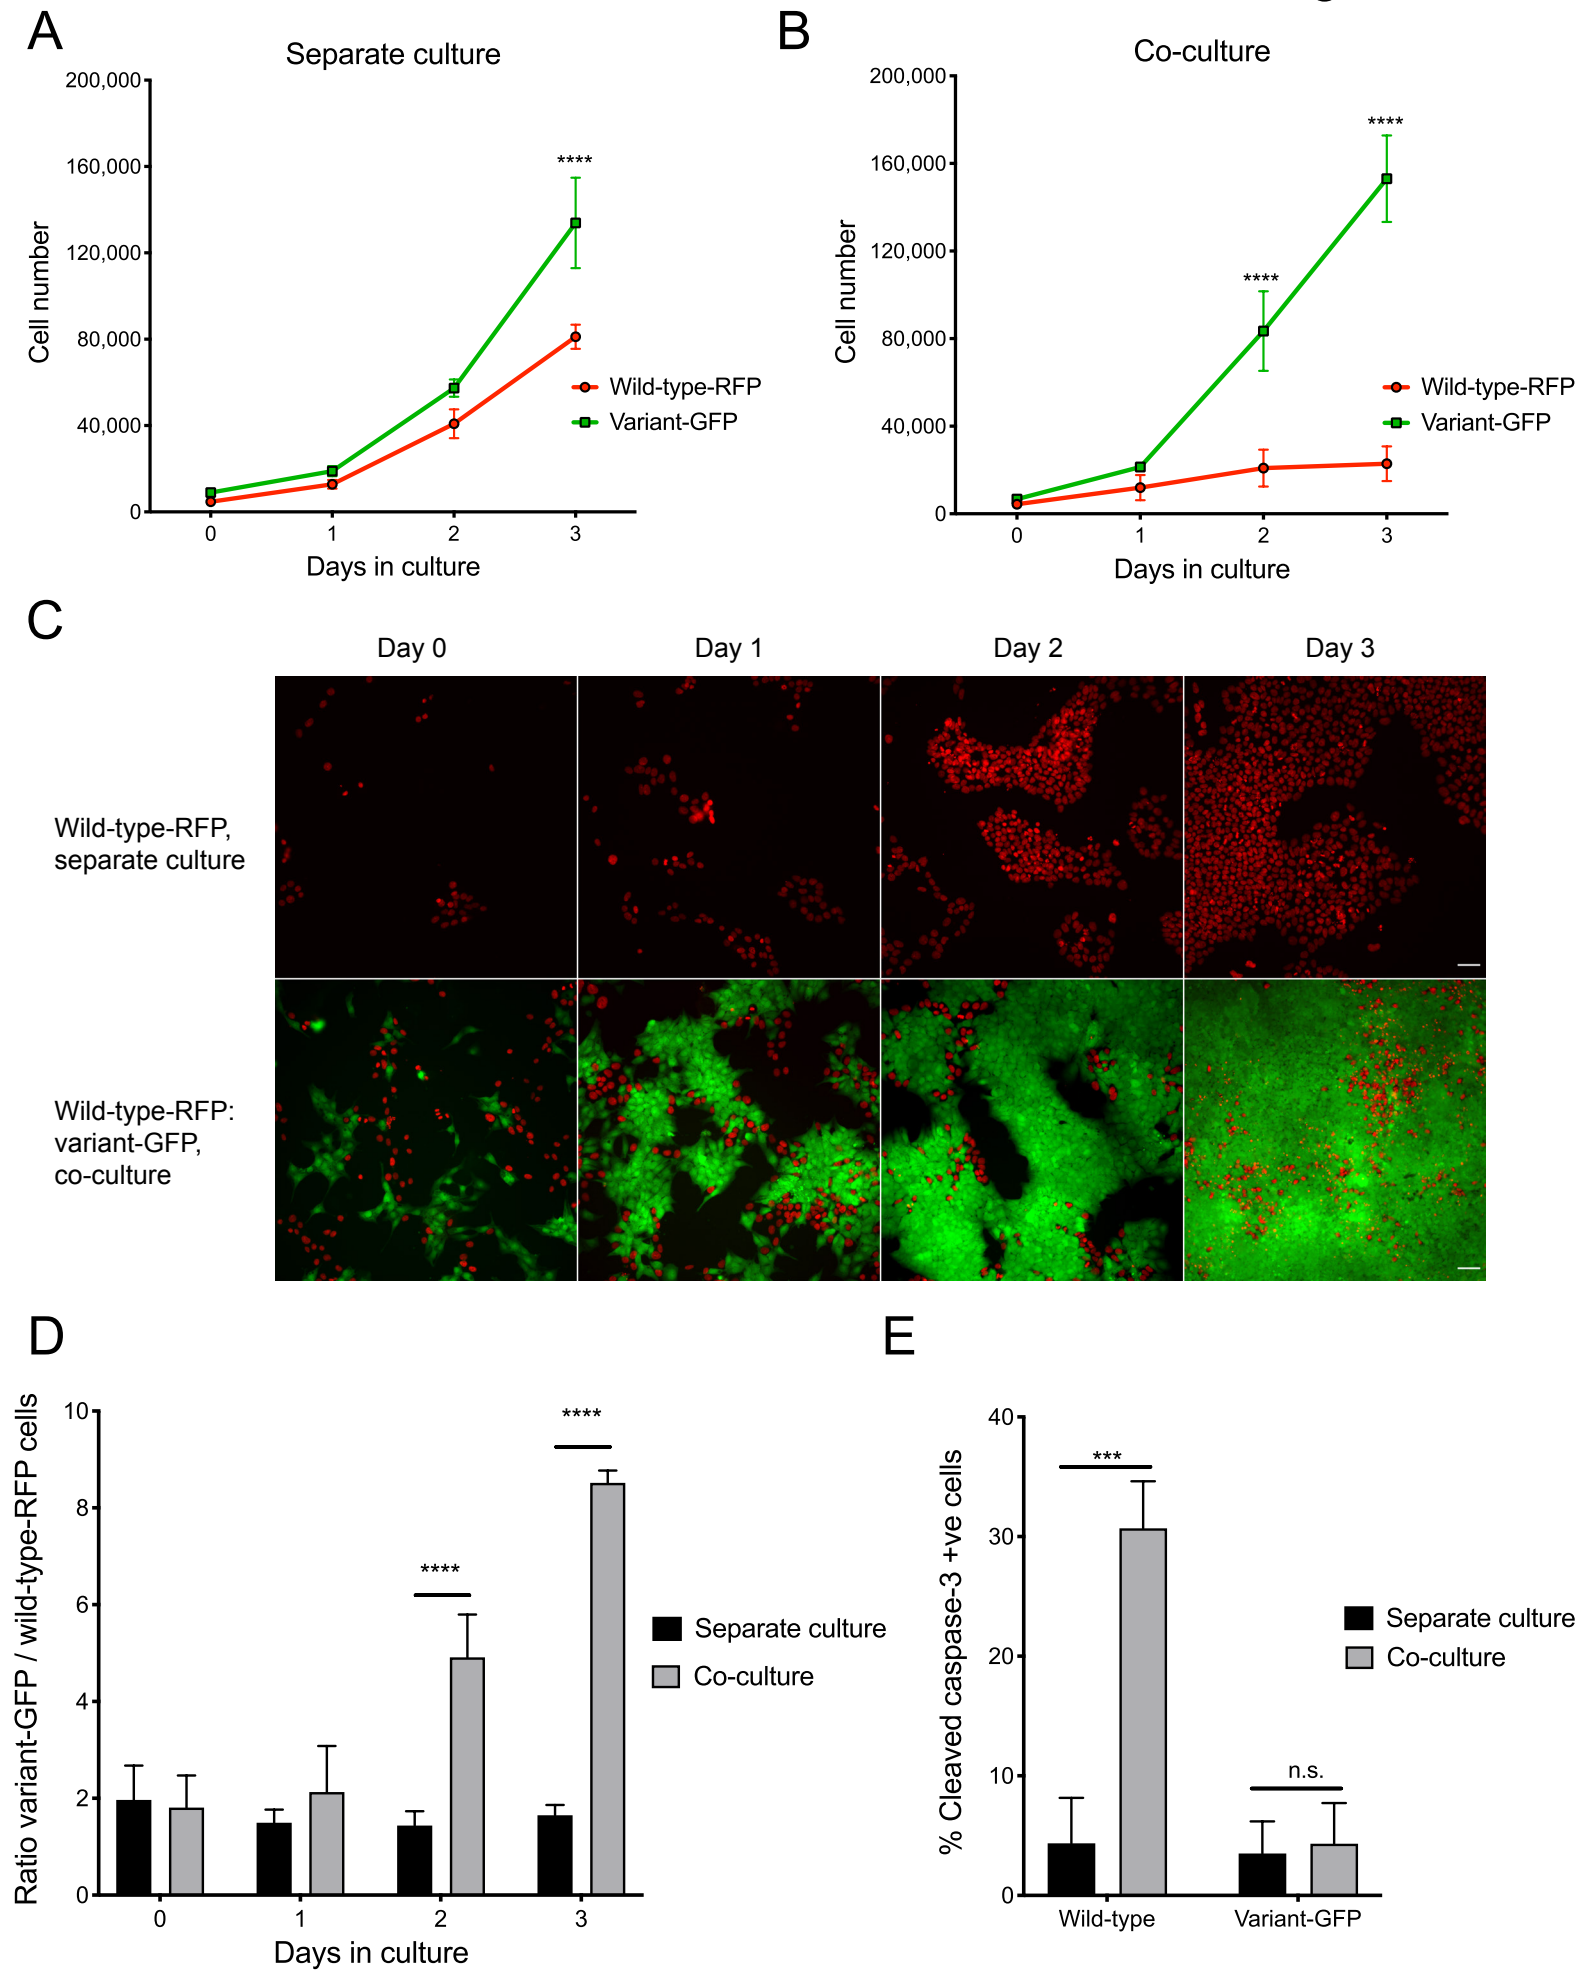

**A**

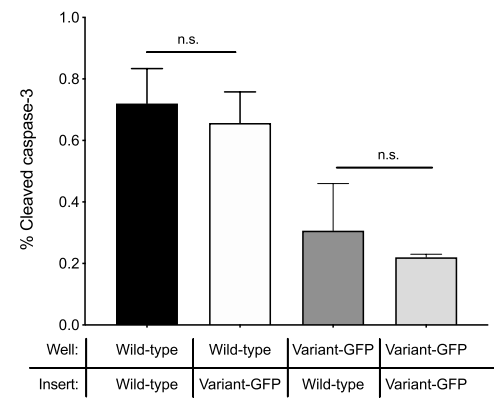

**B**

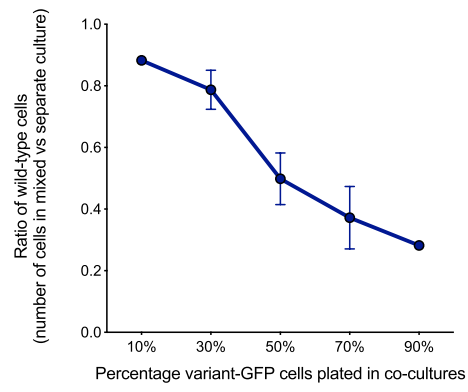

**C**

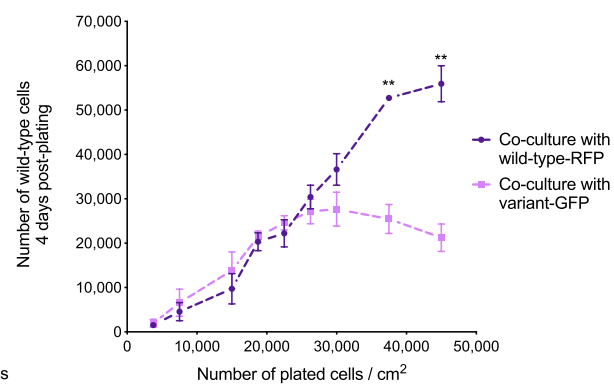

**D**

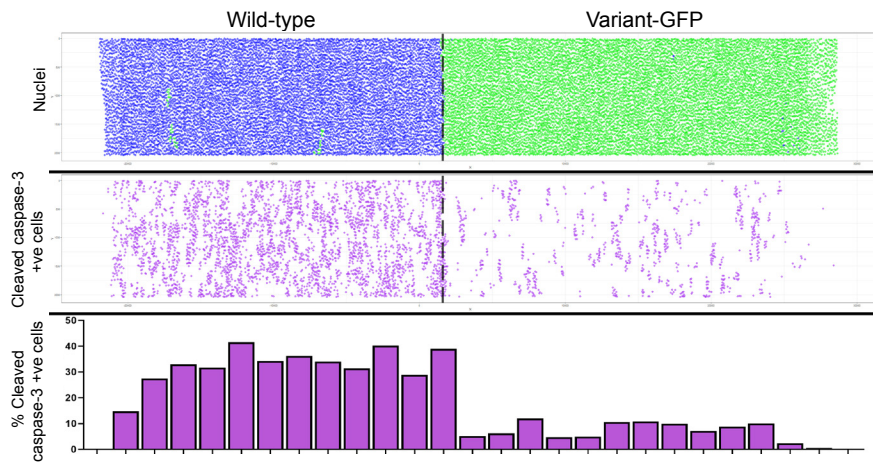

**F**

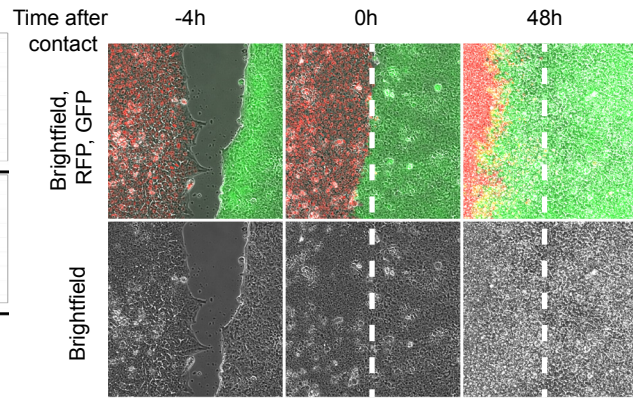

**E**

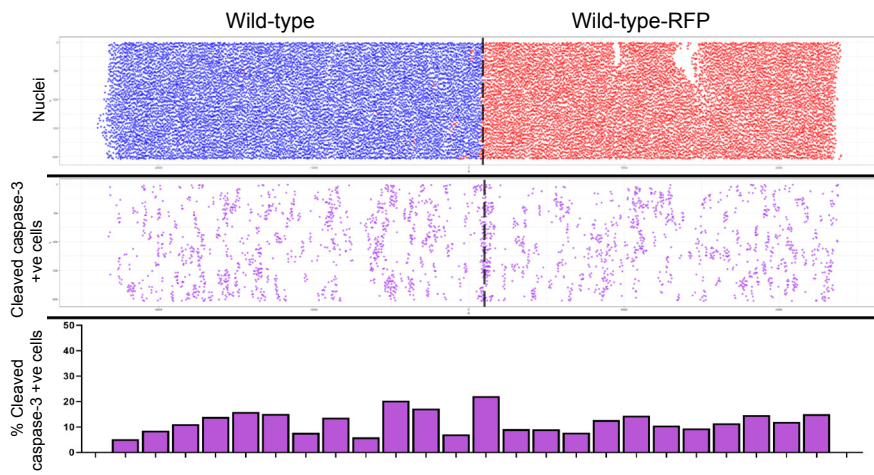

**G**

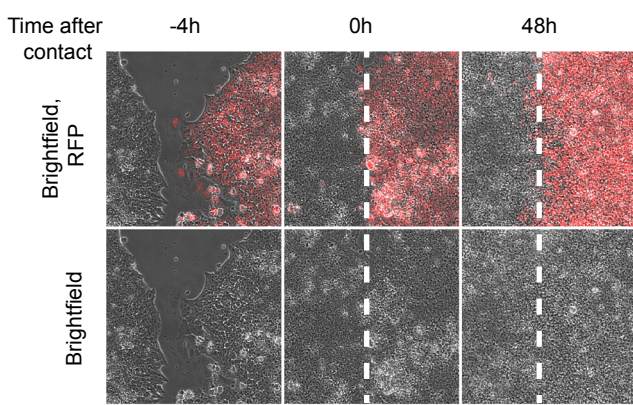

**H**

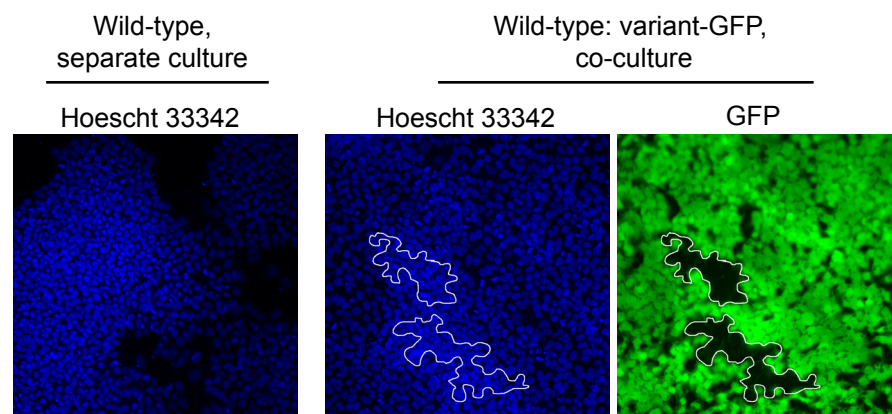

**I**

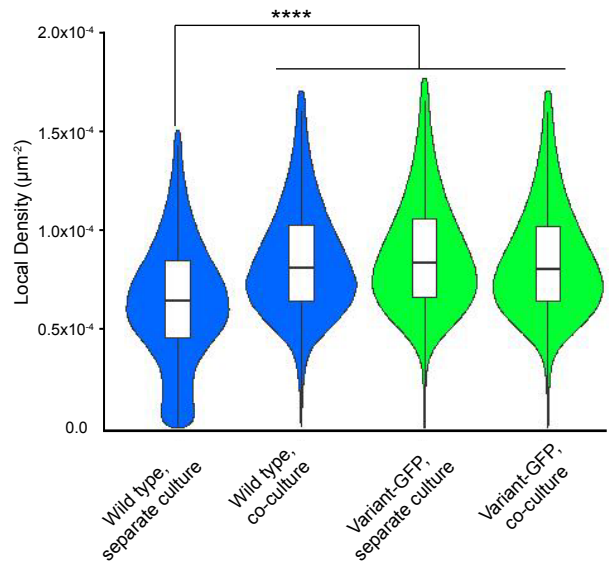

A

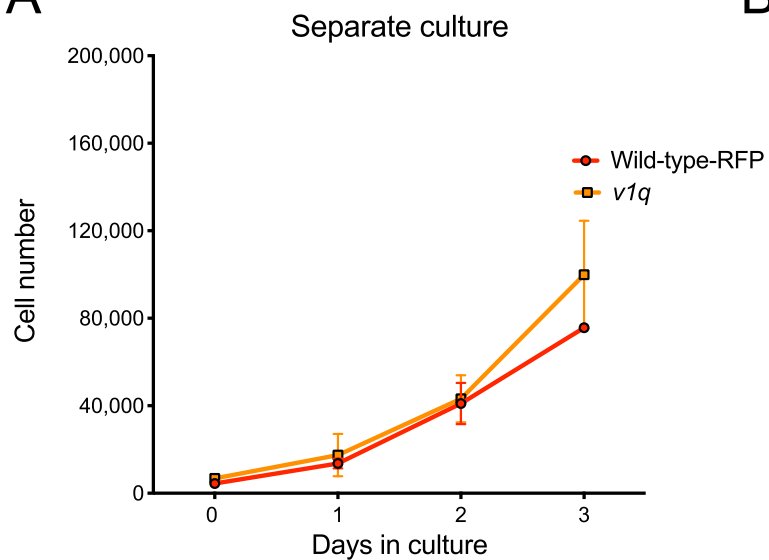

B

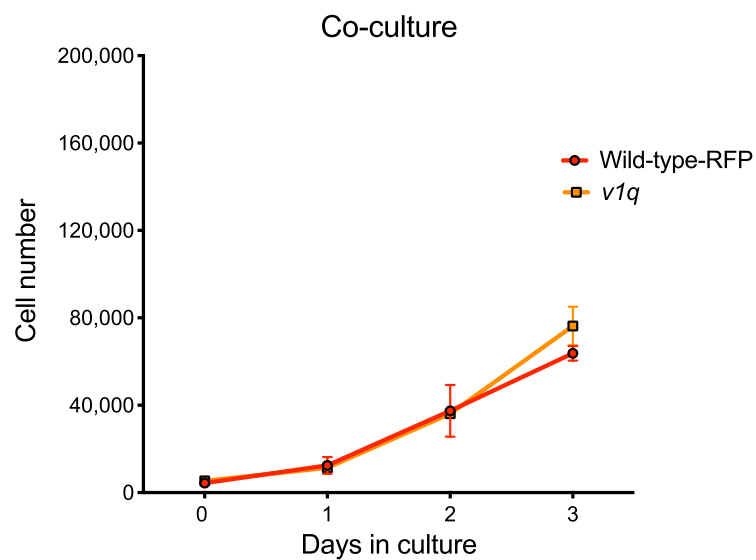

C

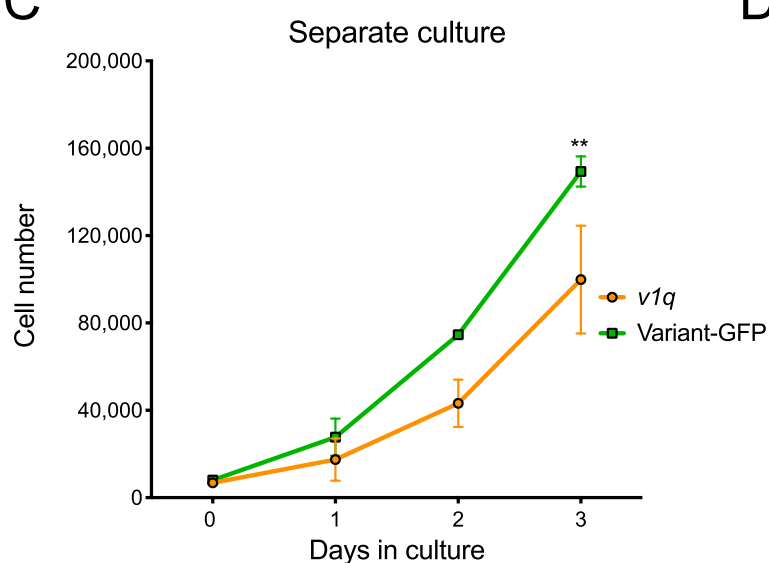

D

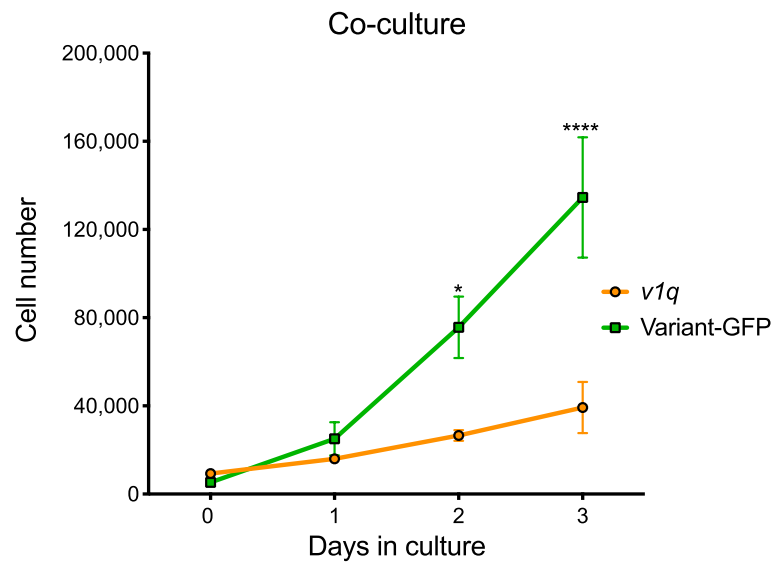

E

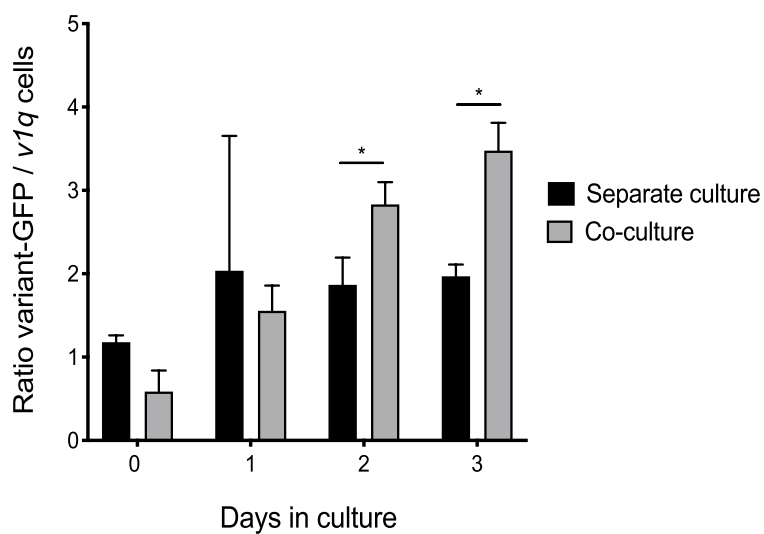

F

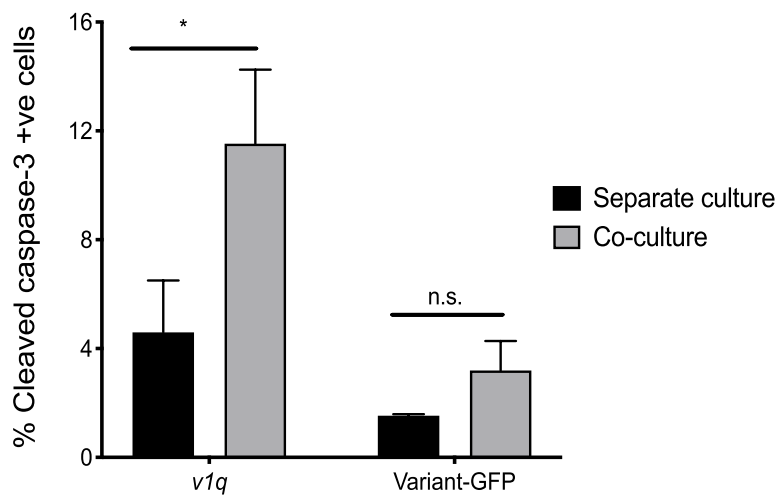

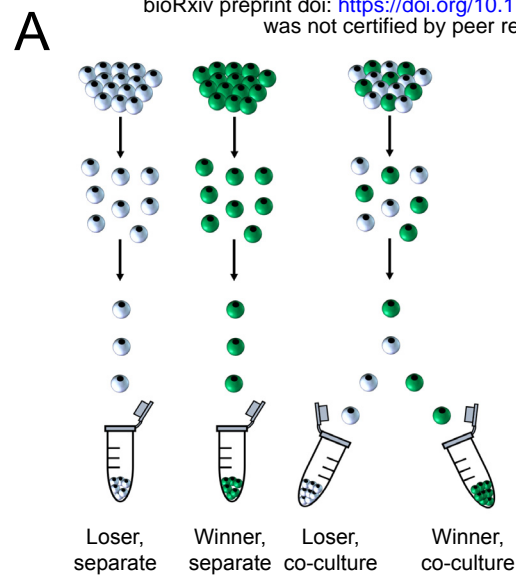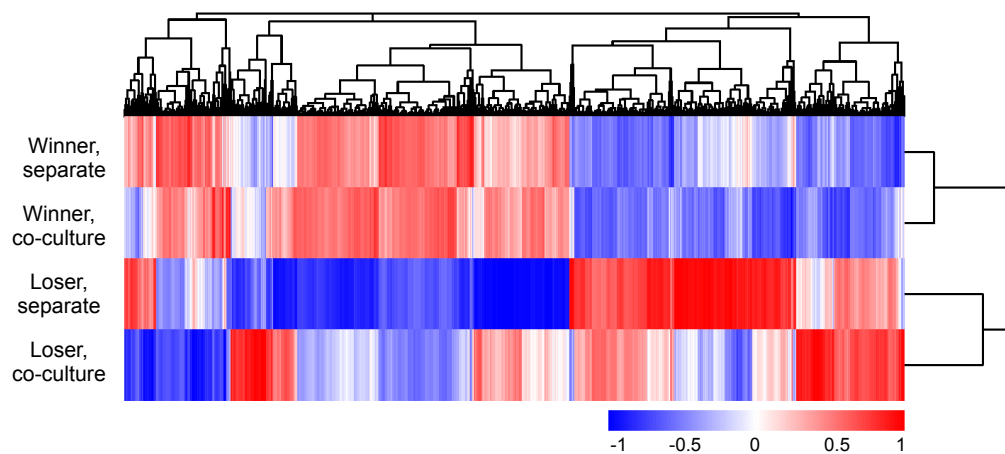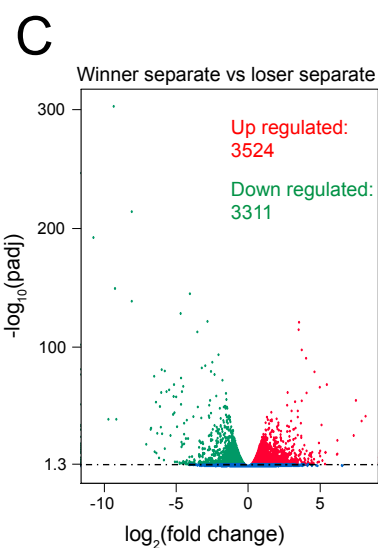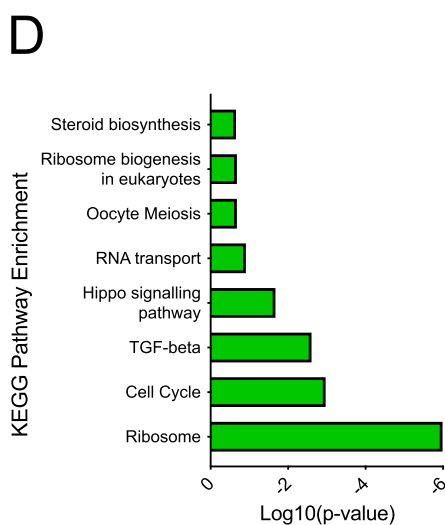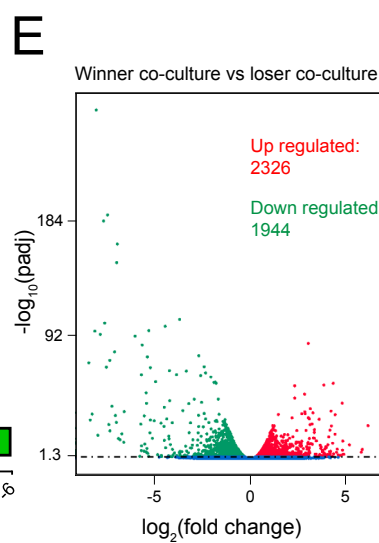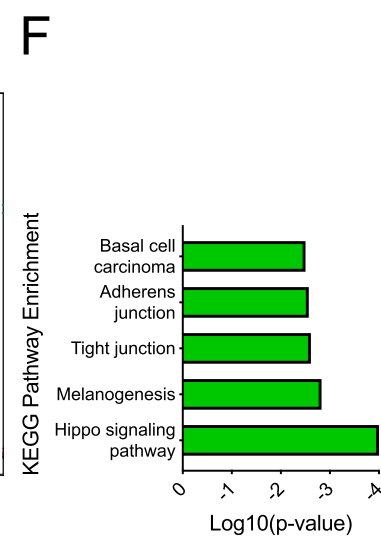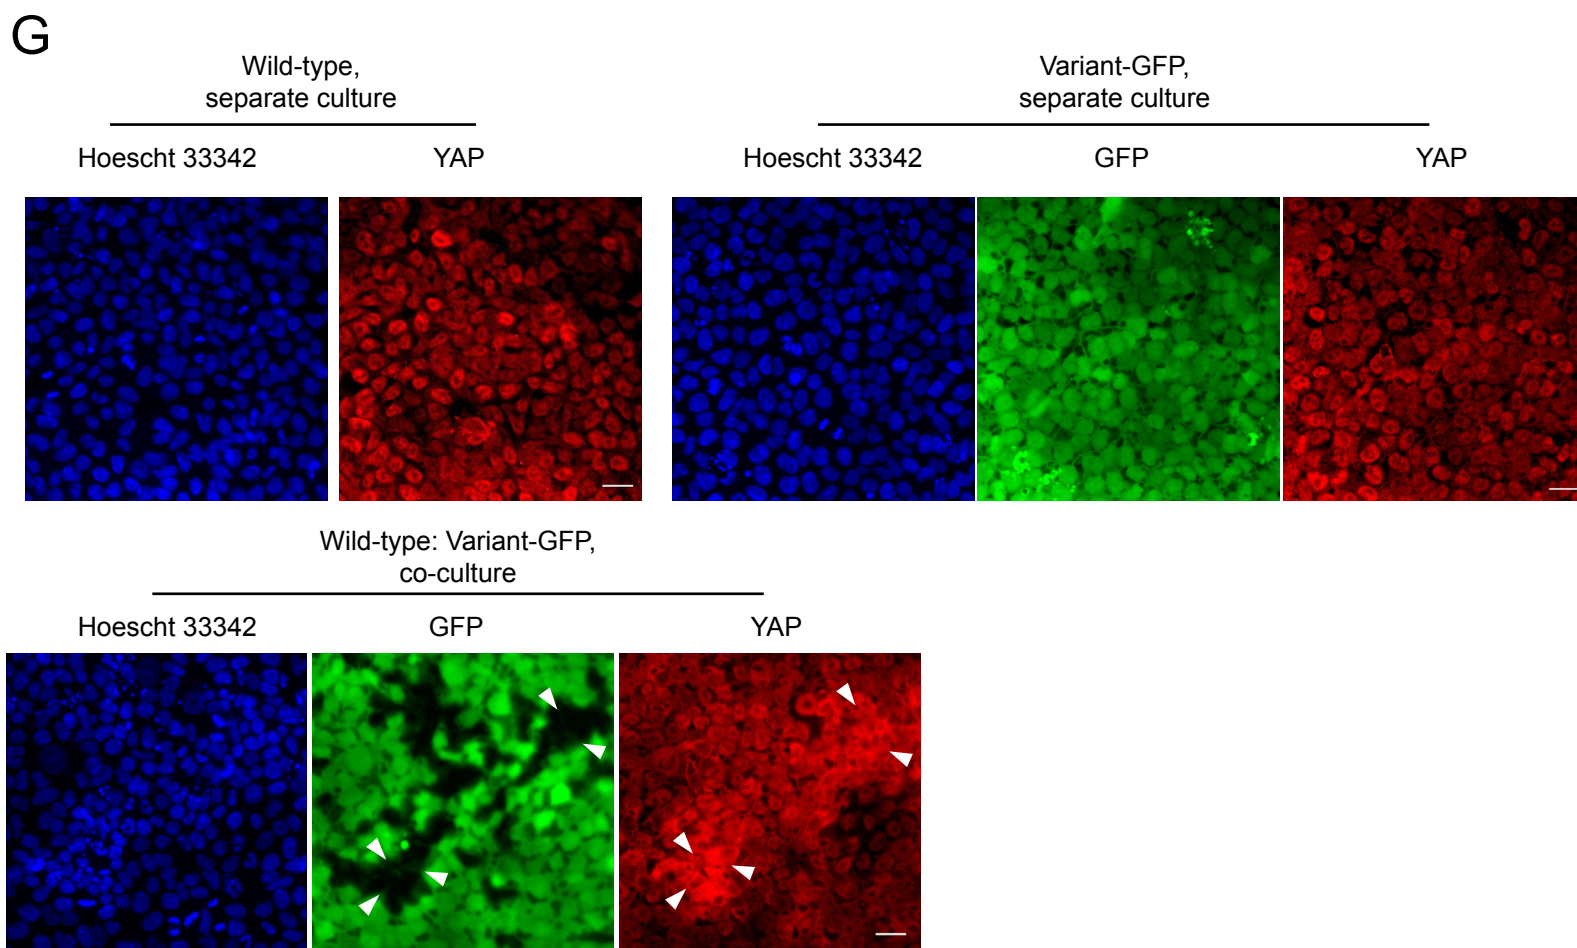



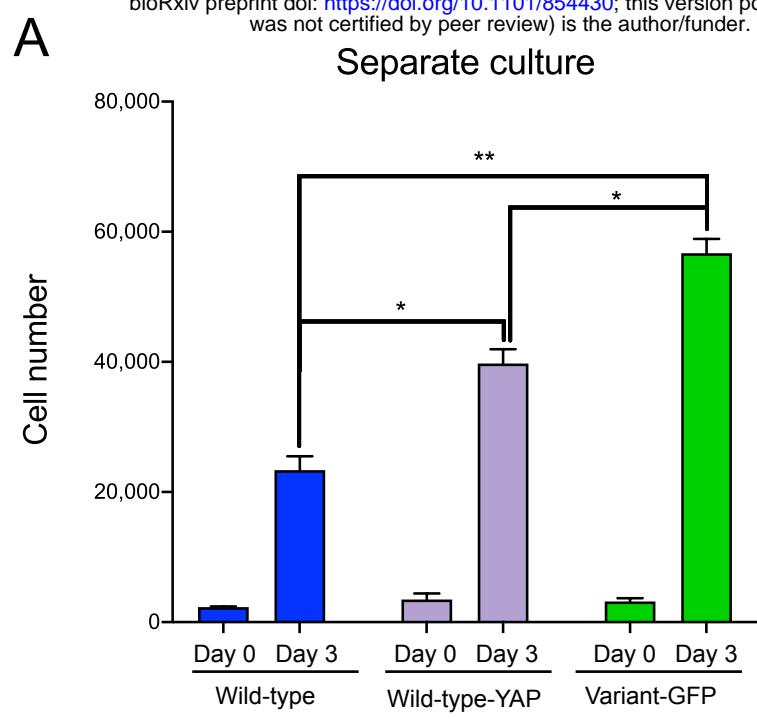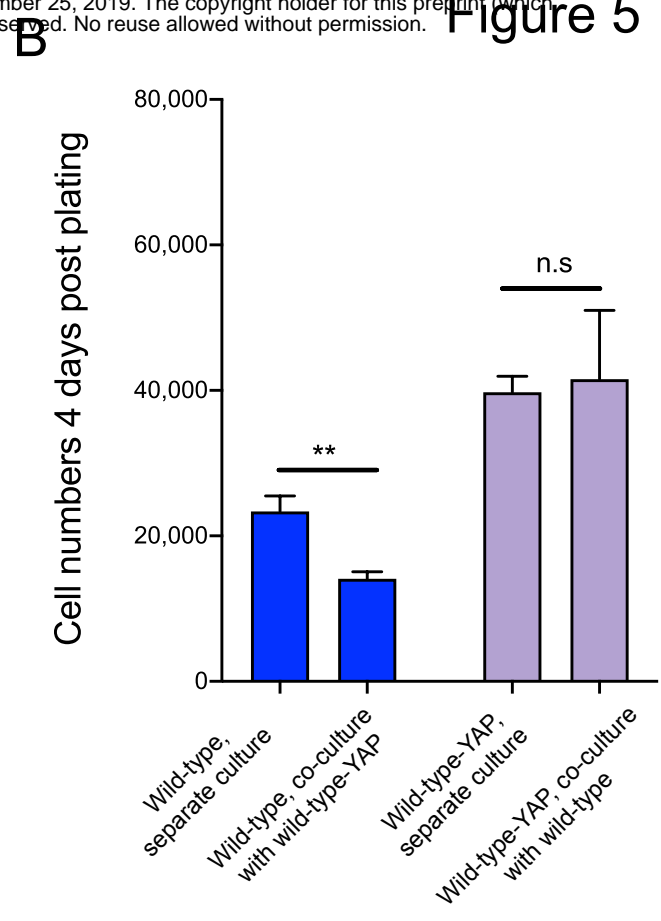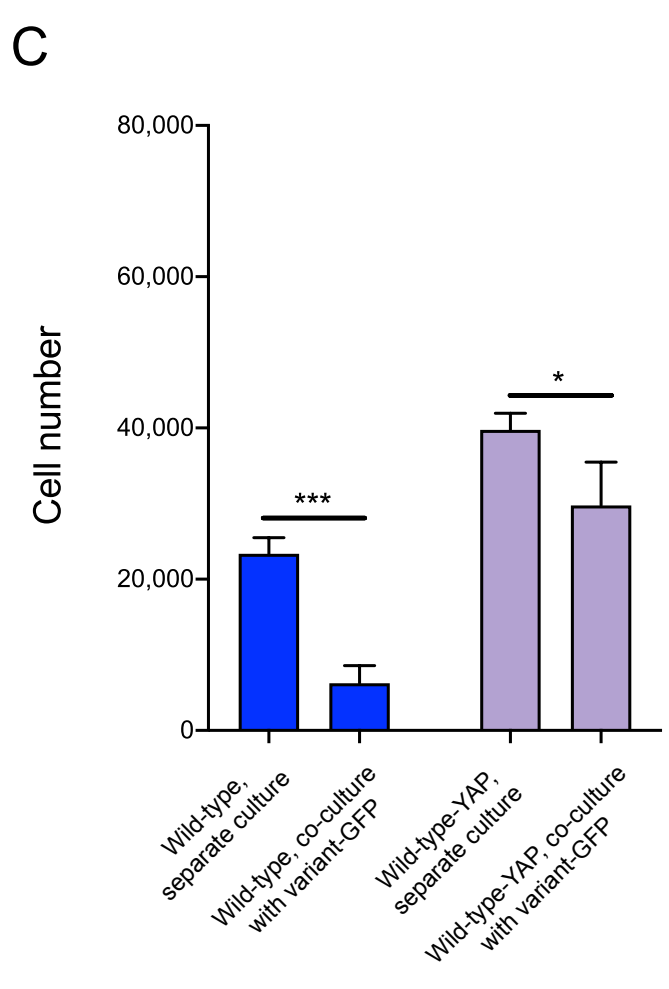

**A**

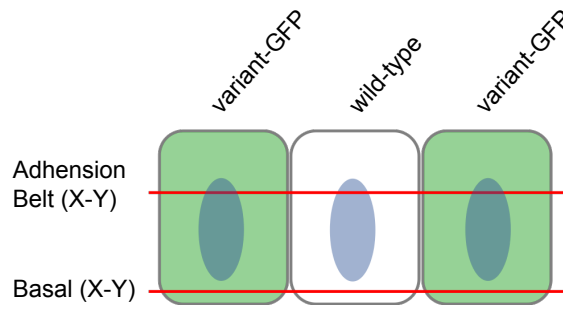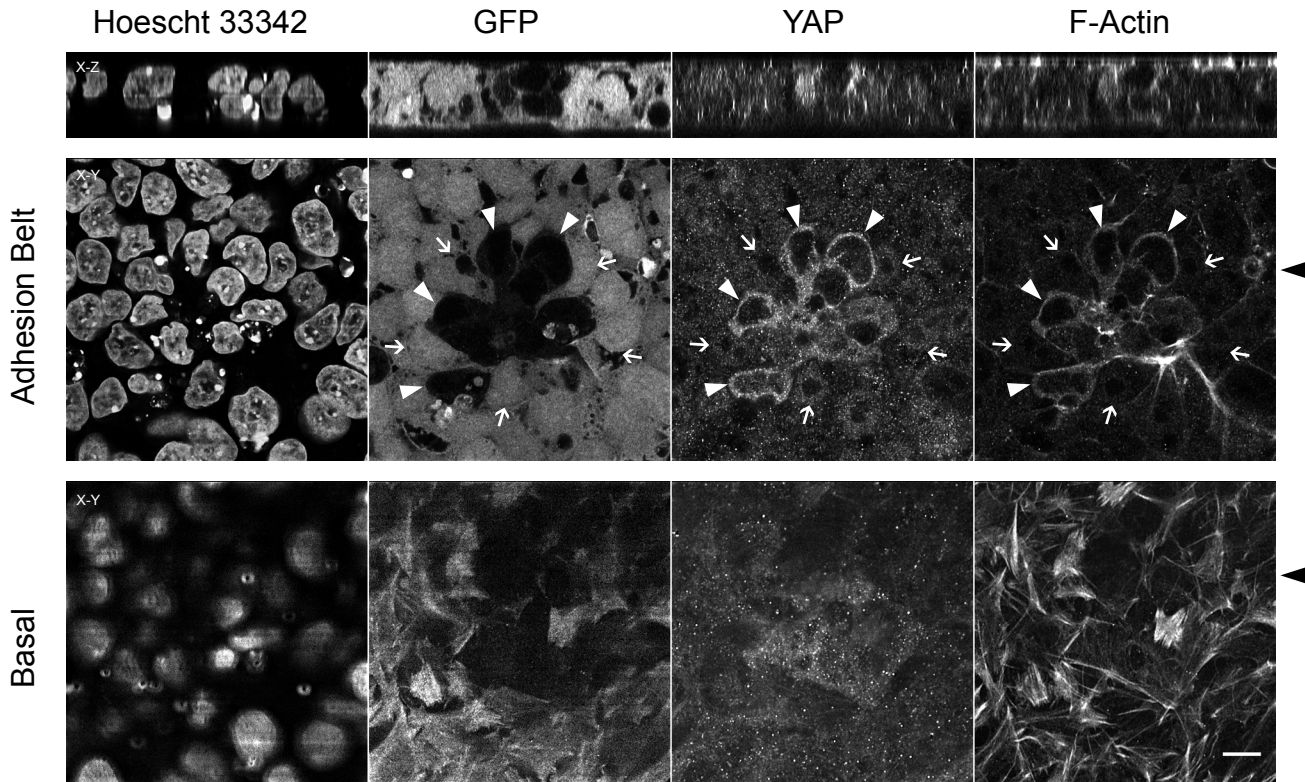

**B**

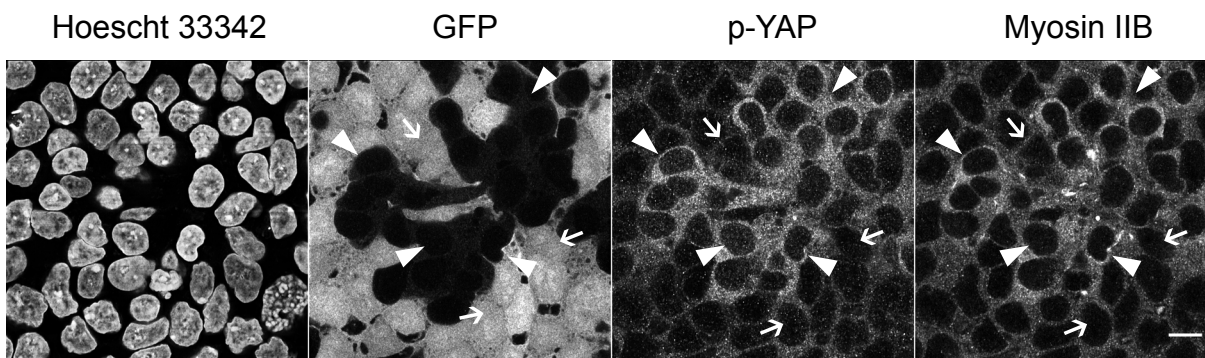

**C**

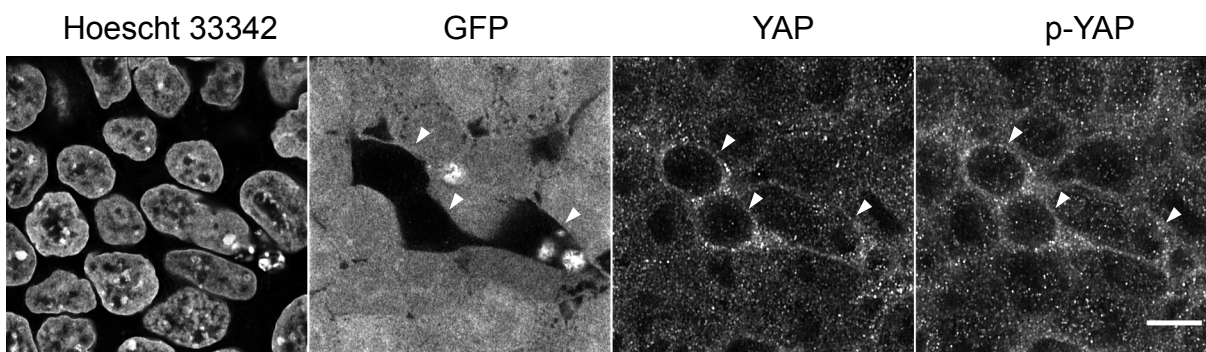

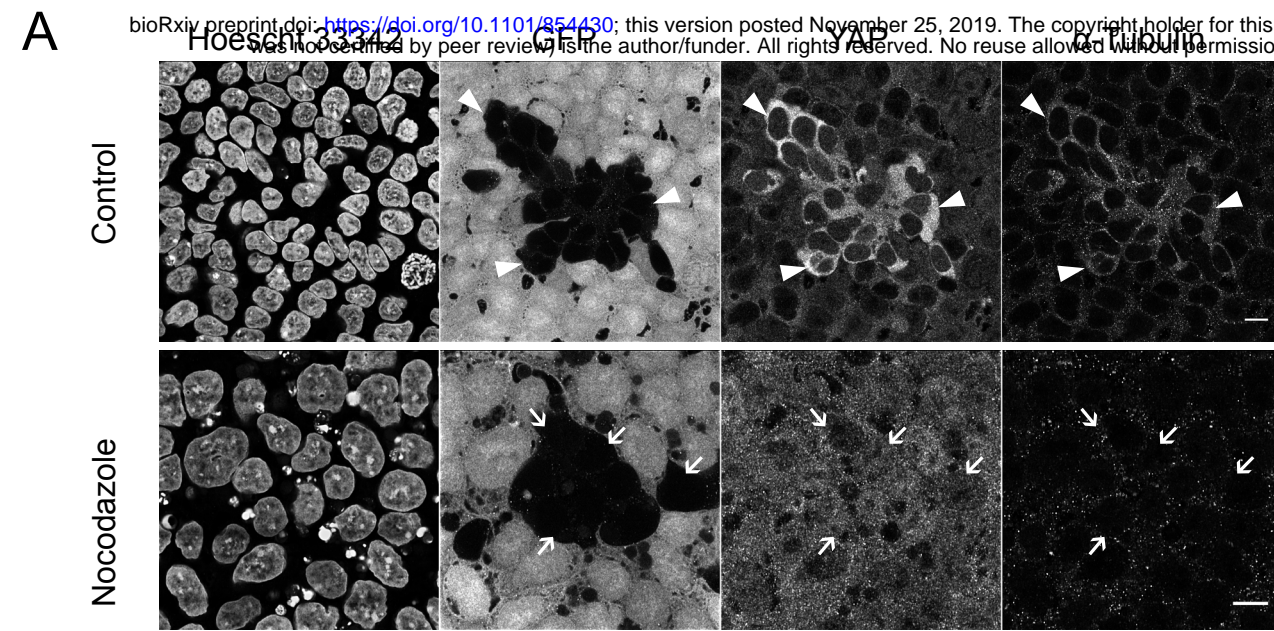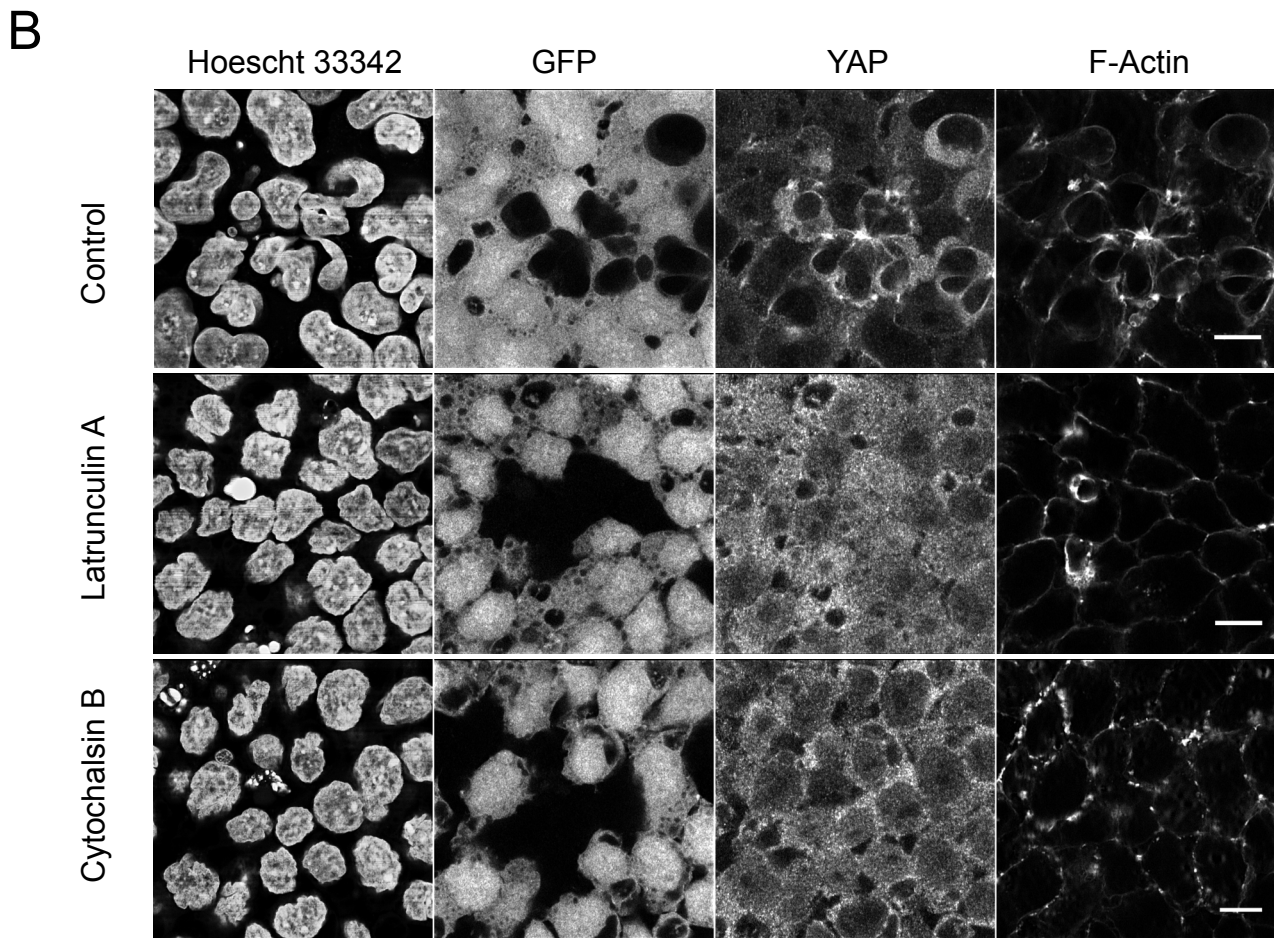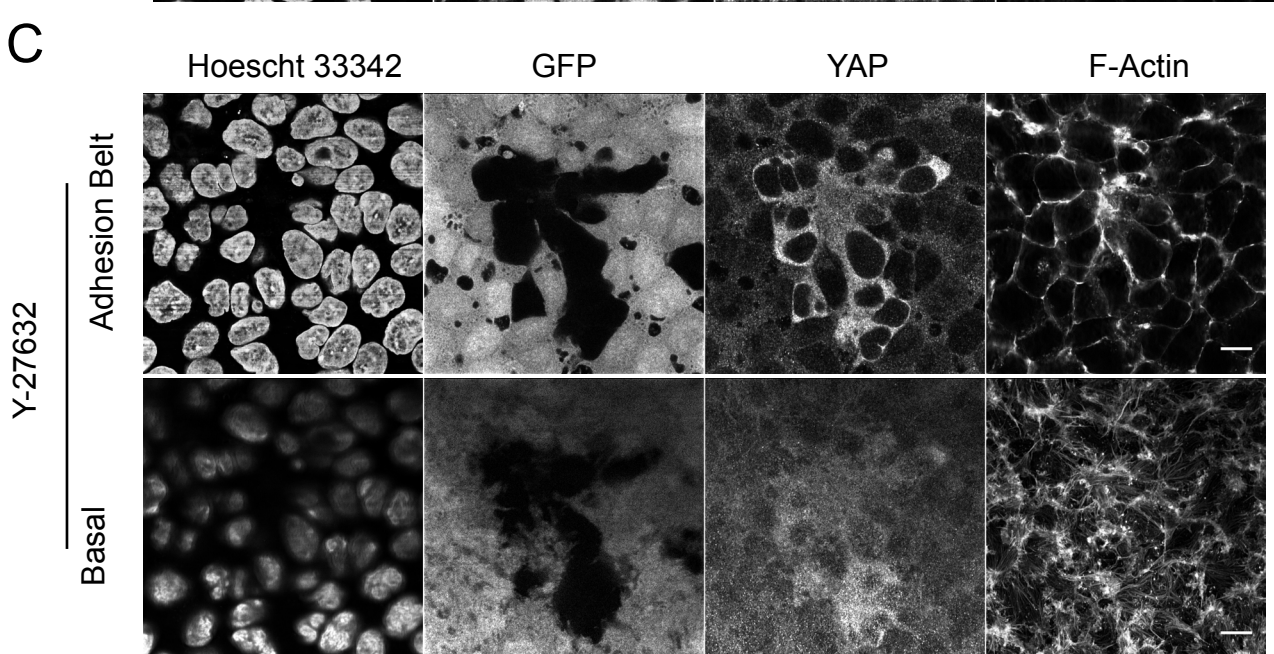

# Supplementary Figure 1

**A**

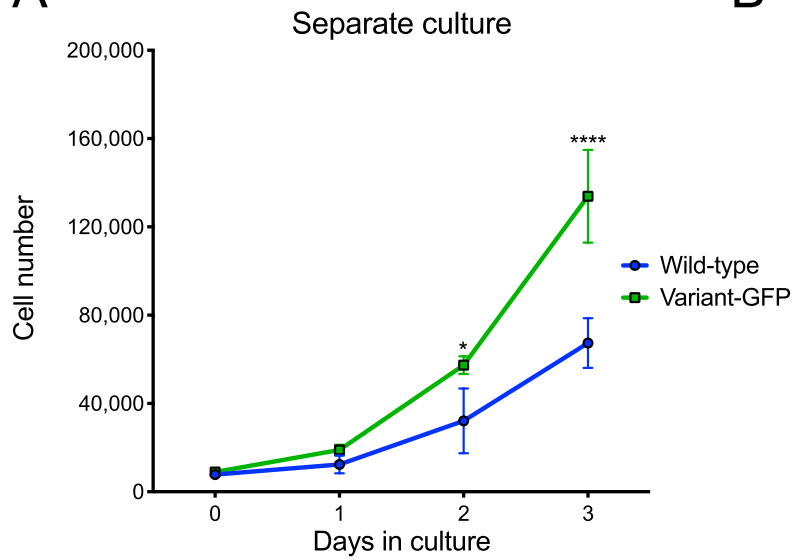

**B**

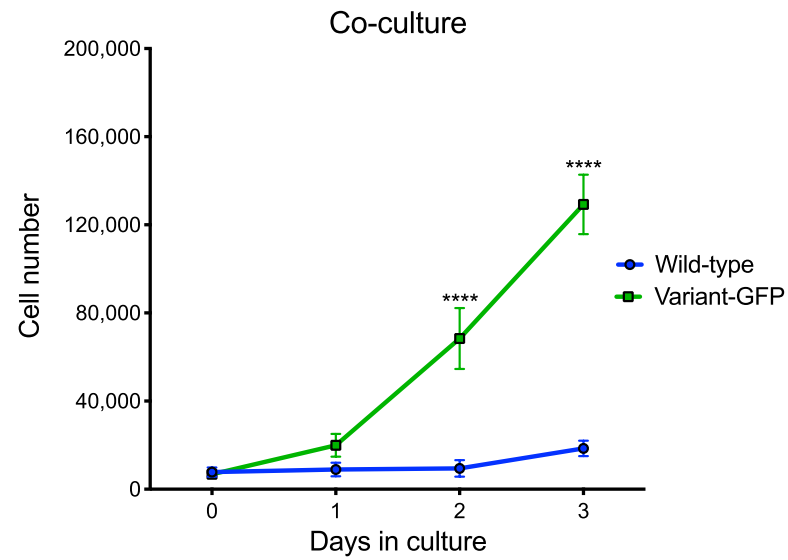

**C**

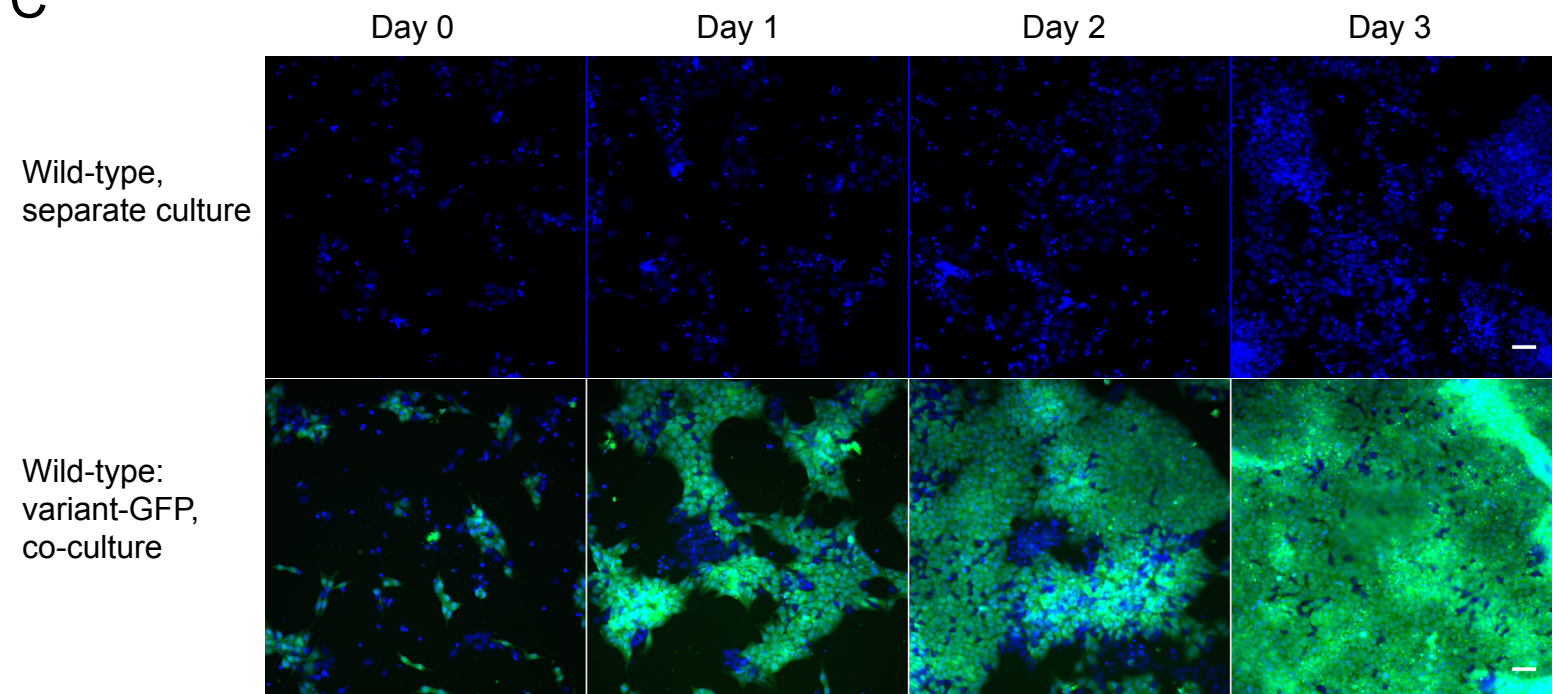

**D**

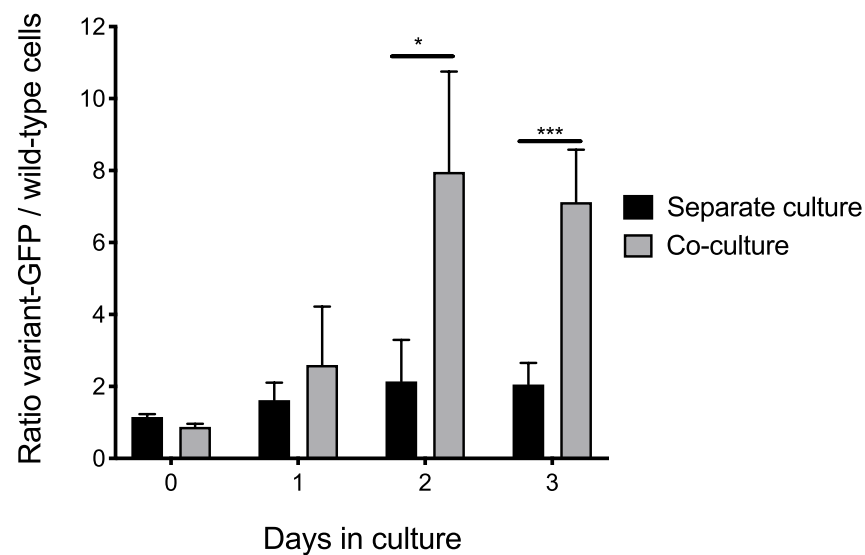

A

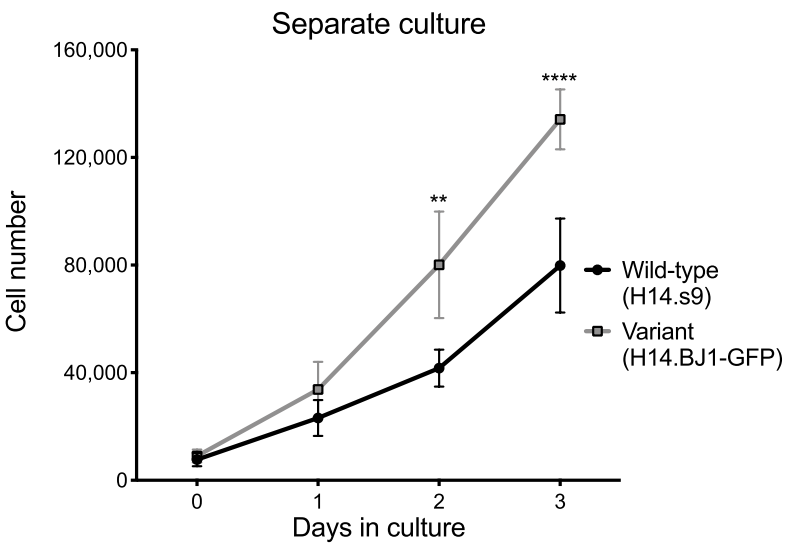

B

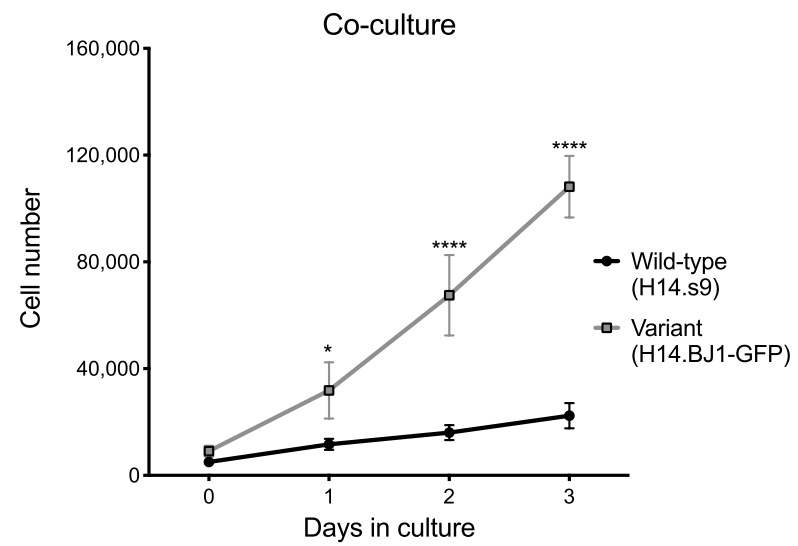

C

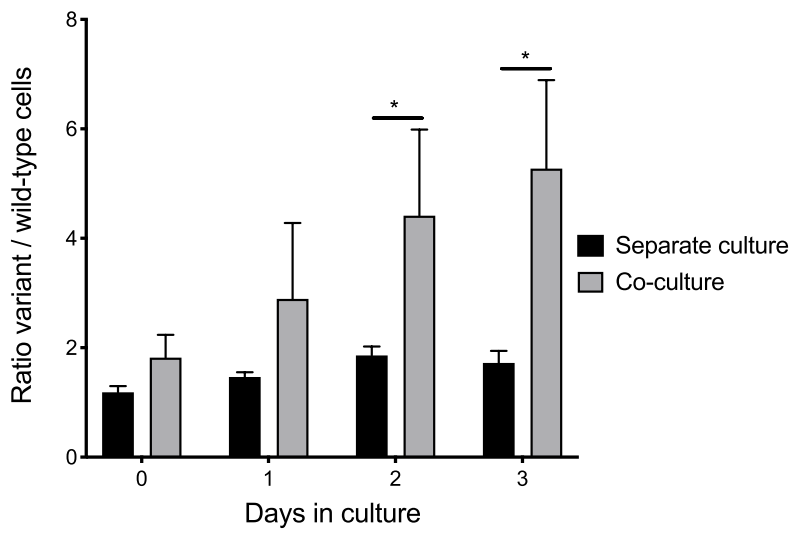

D

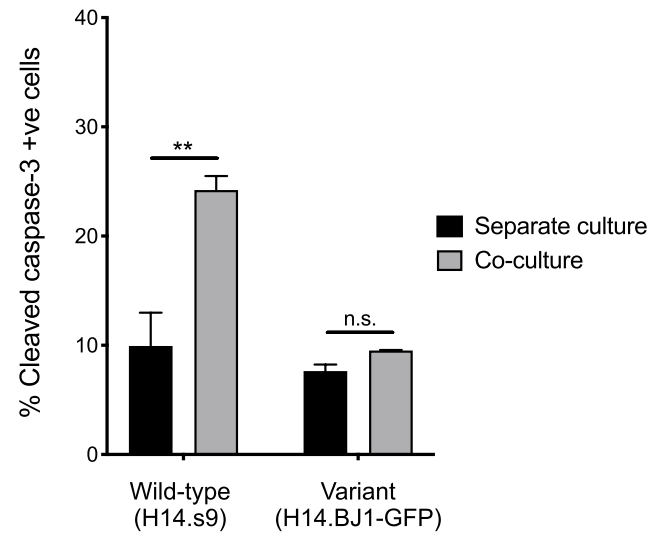

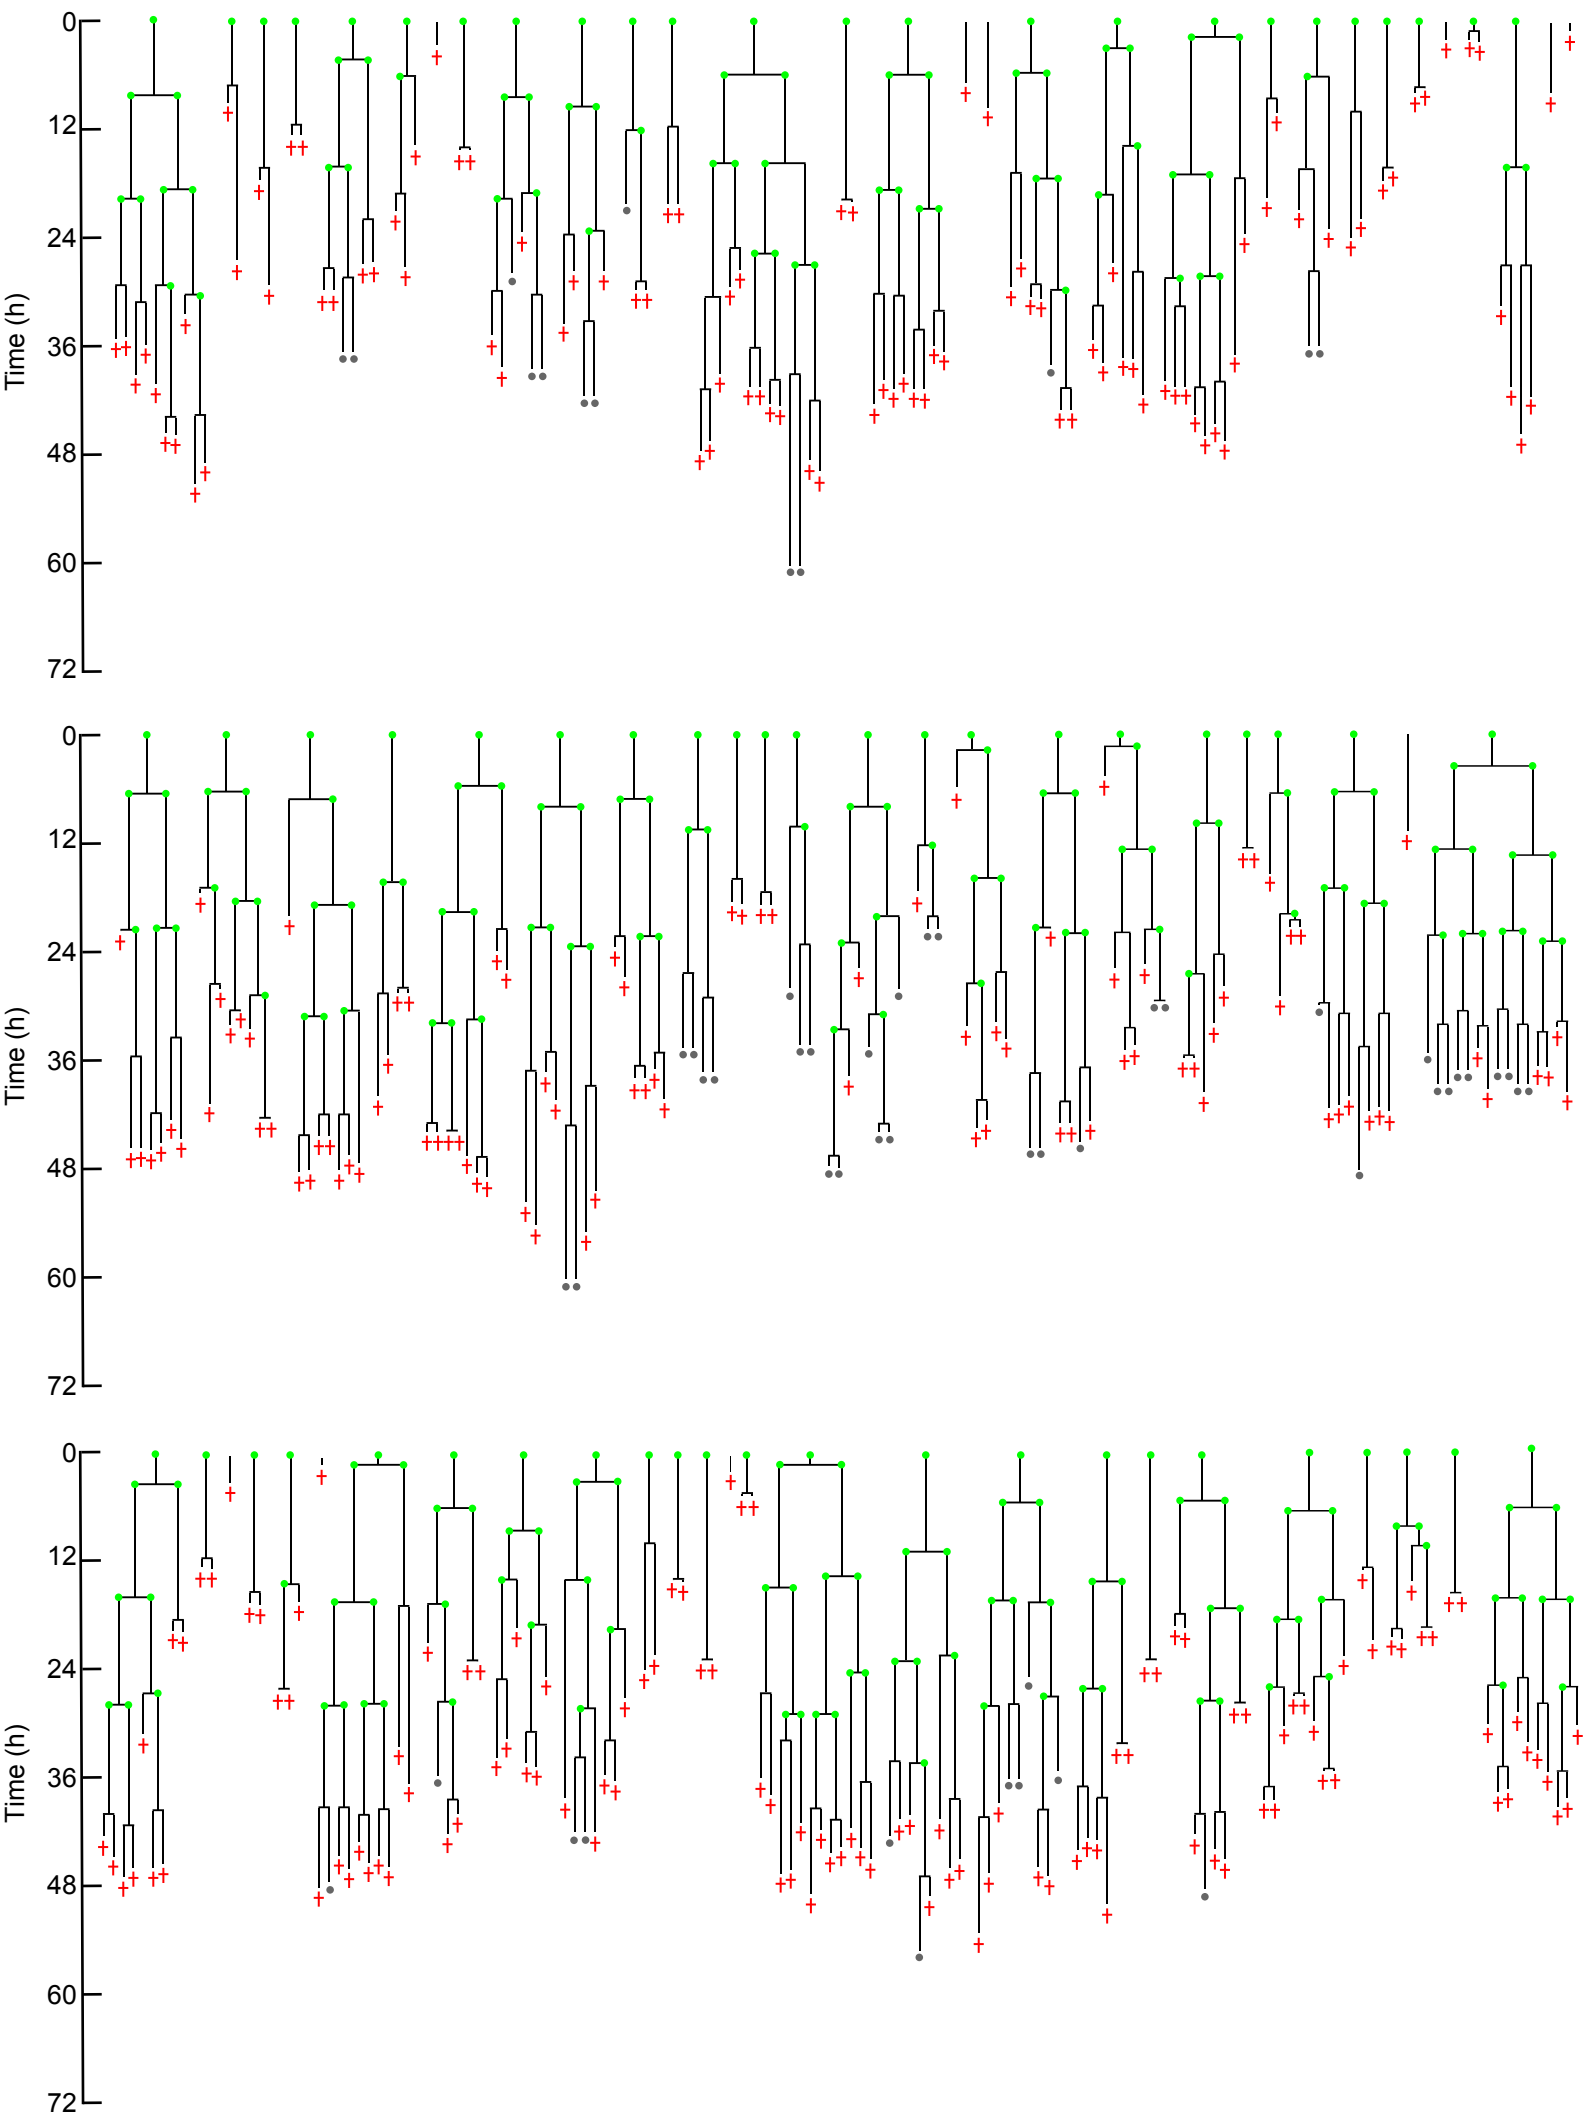

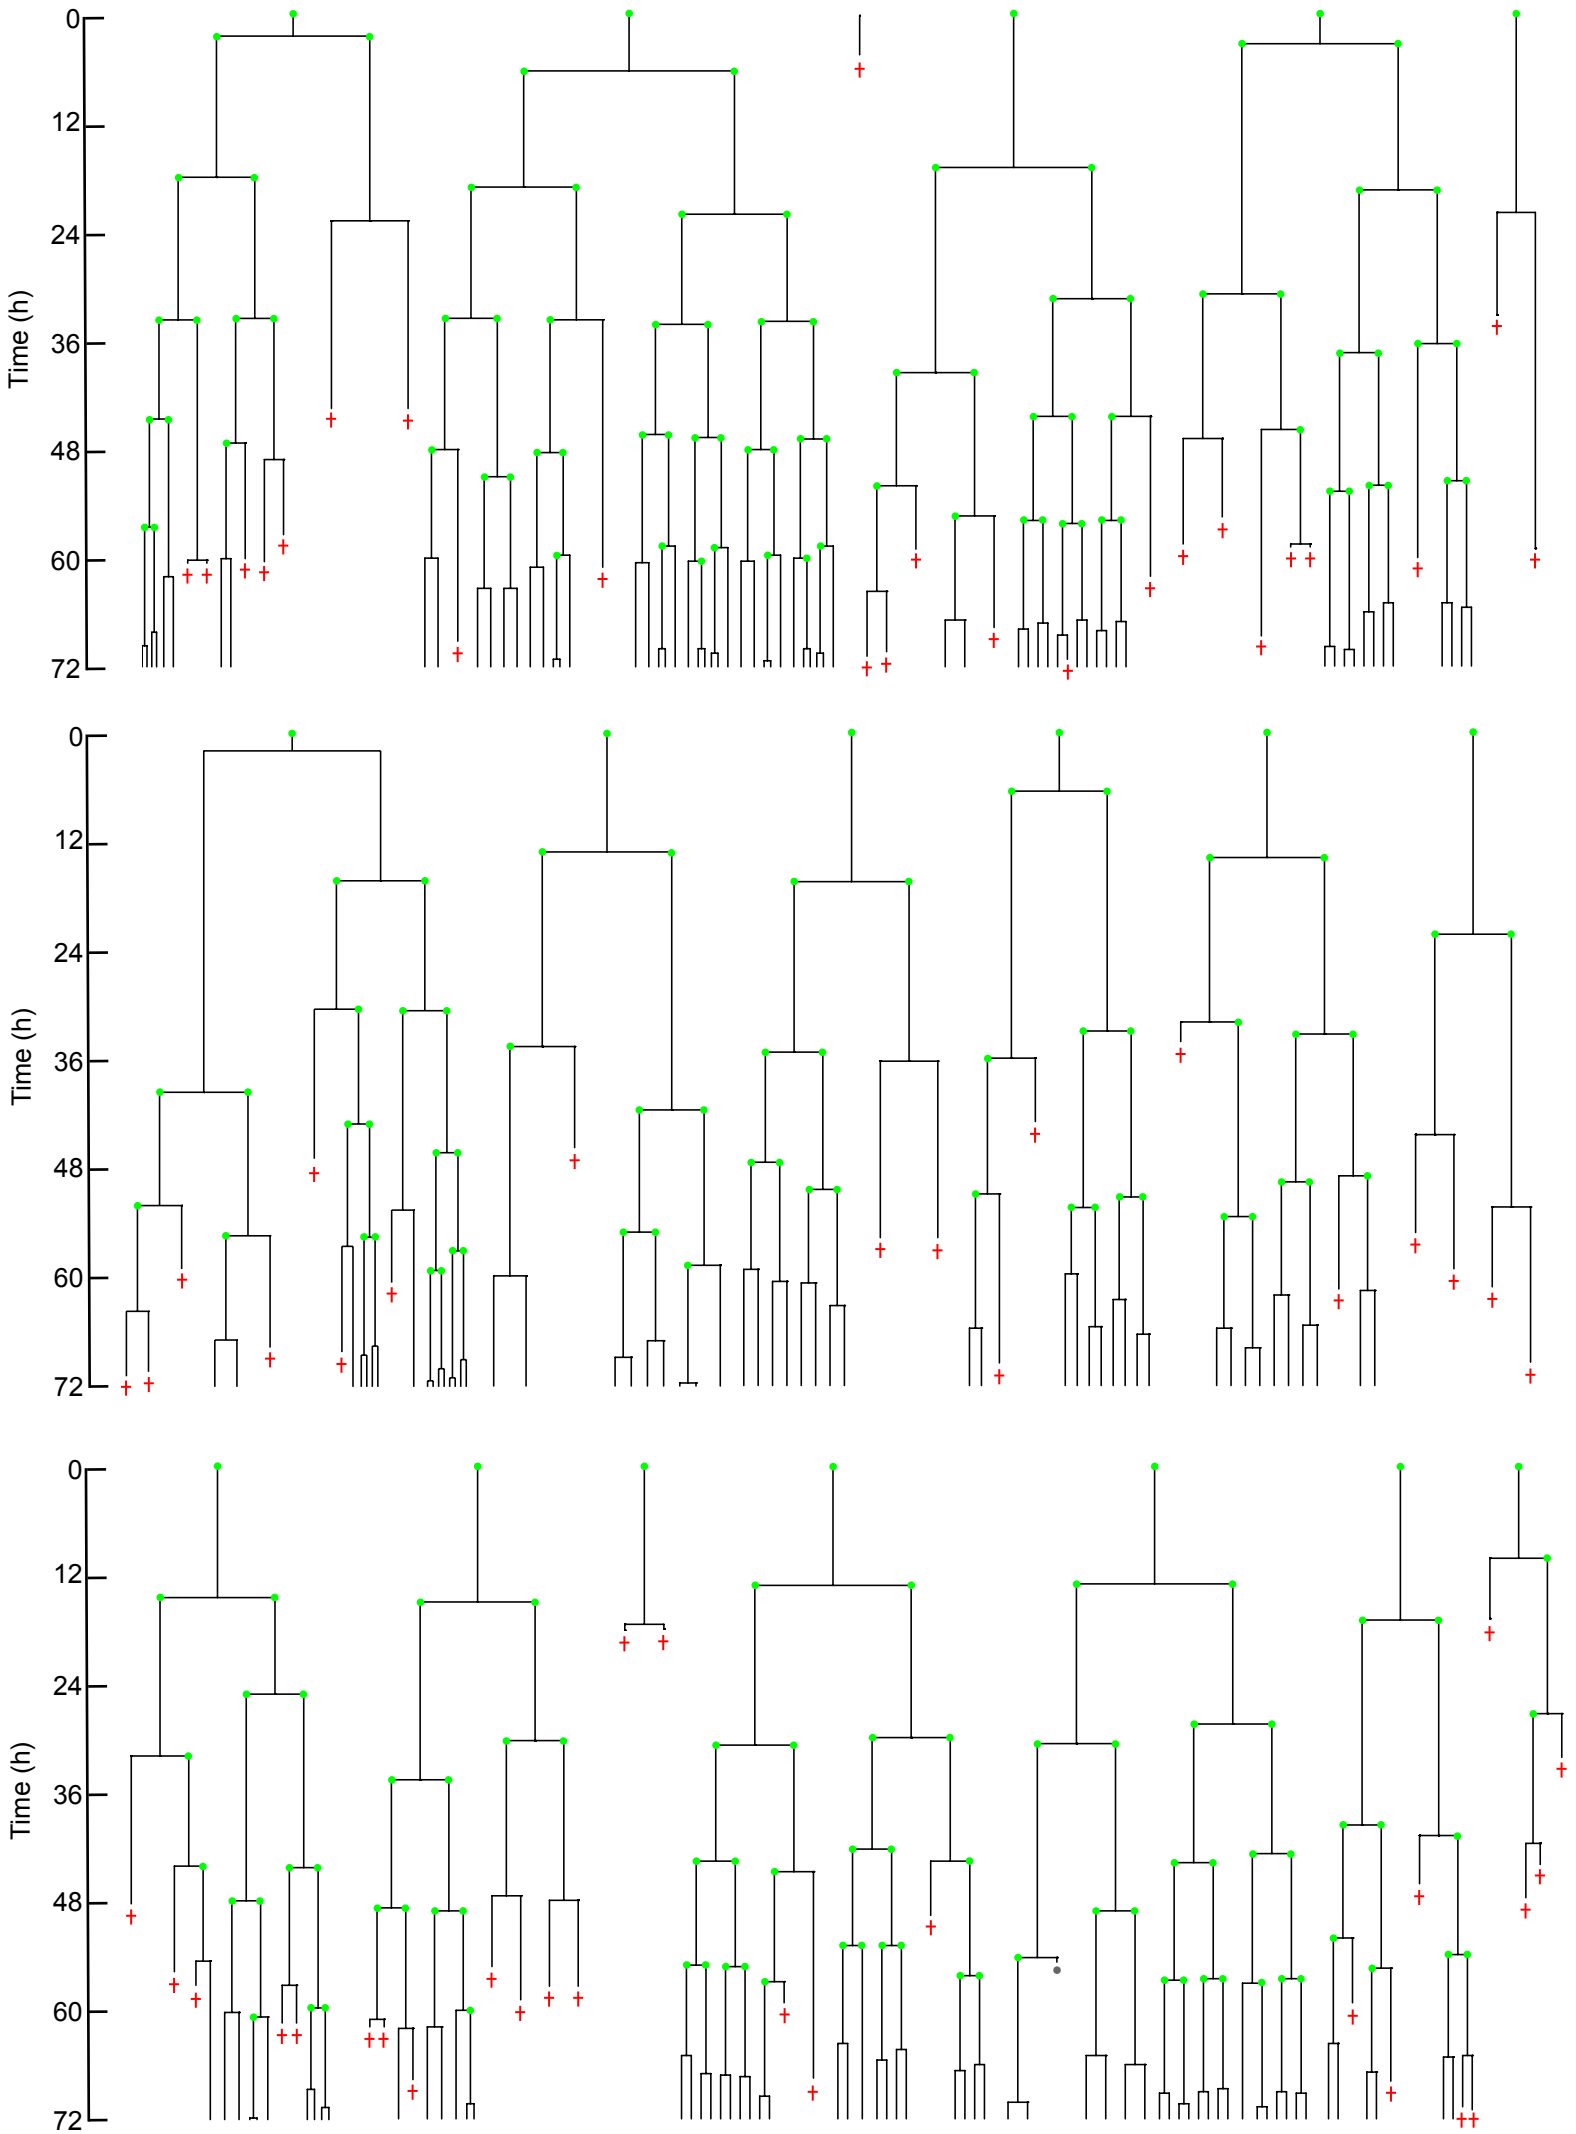

A

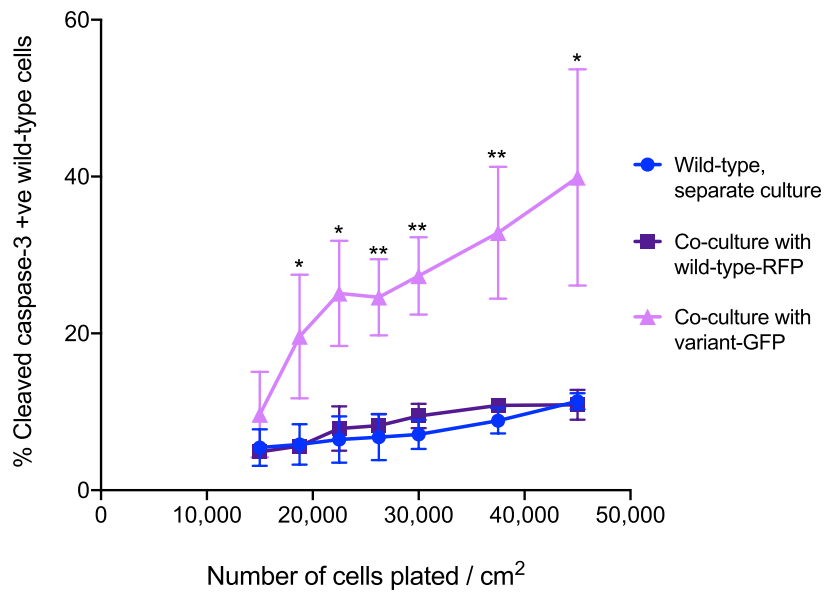

B

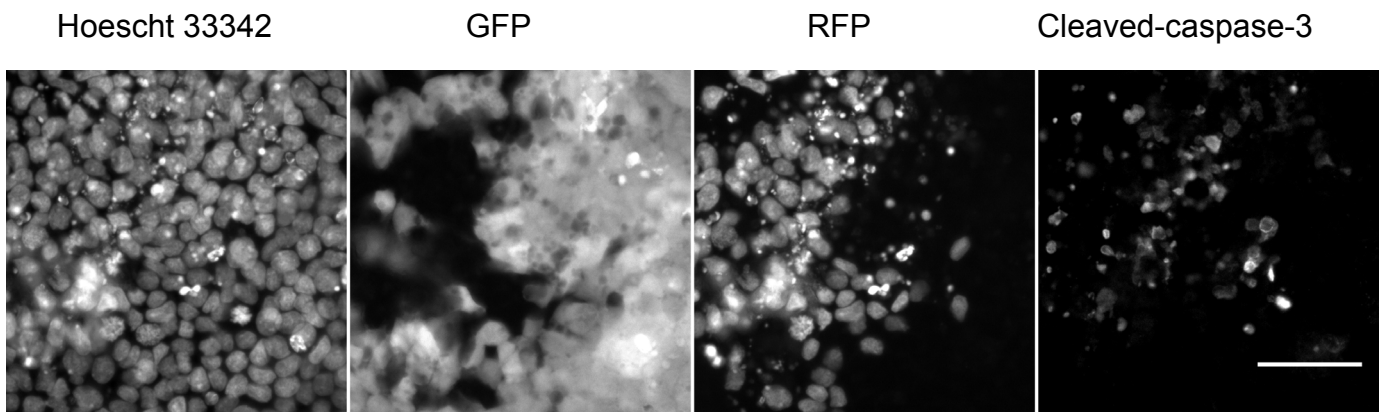



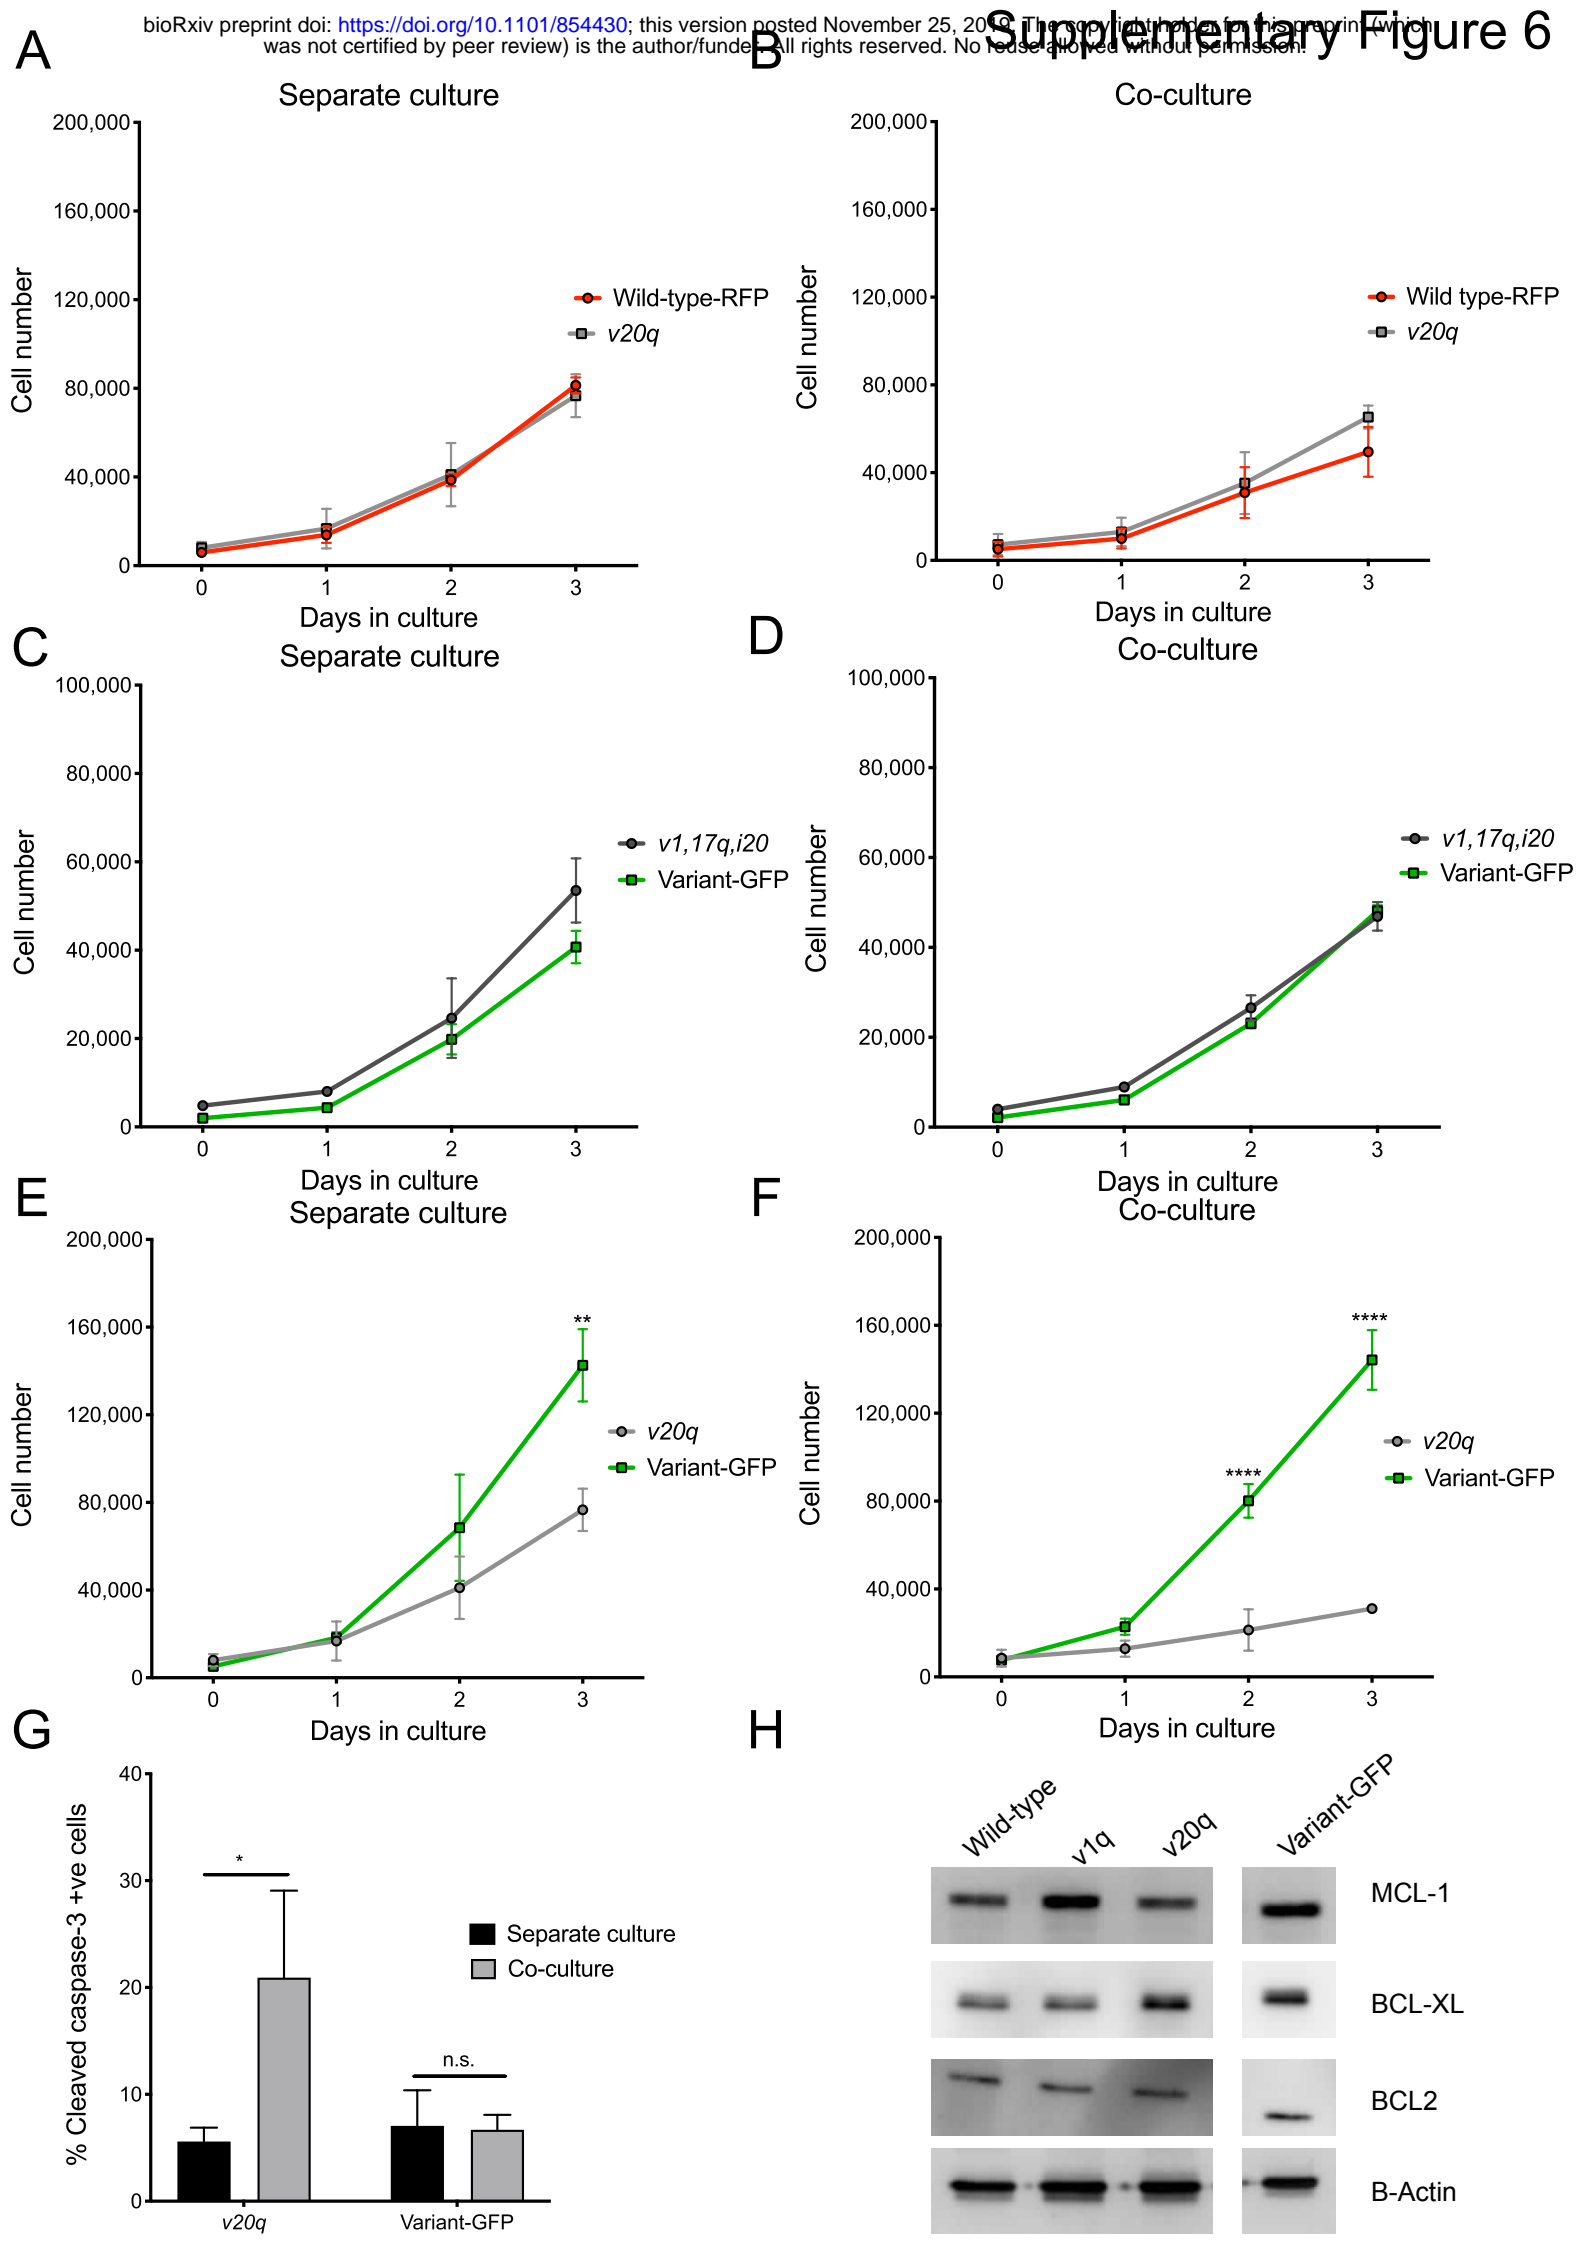

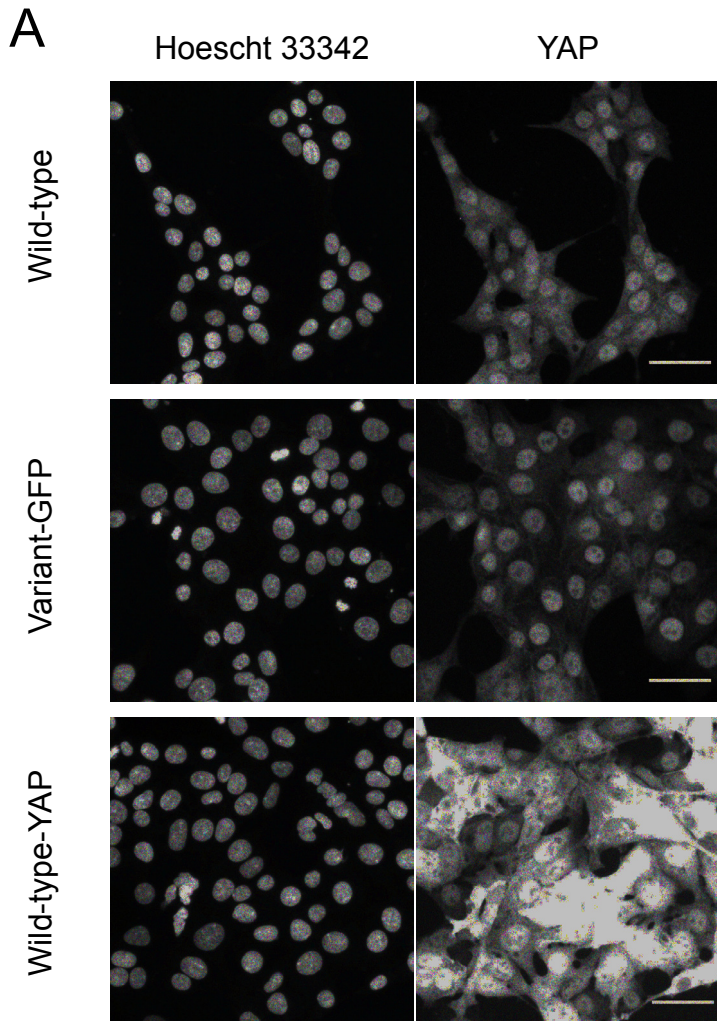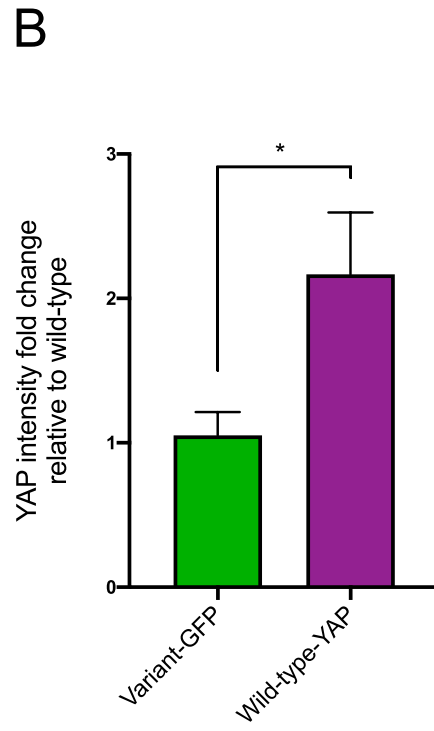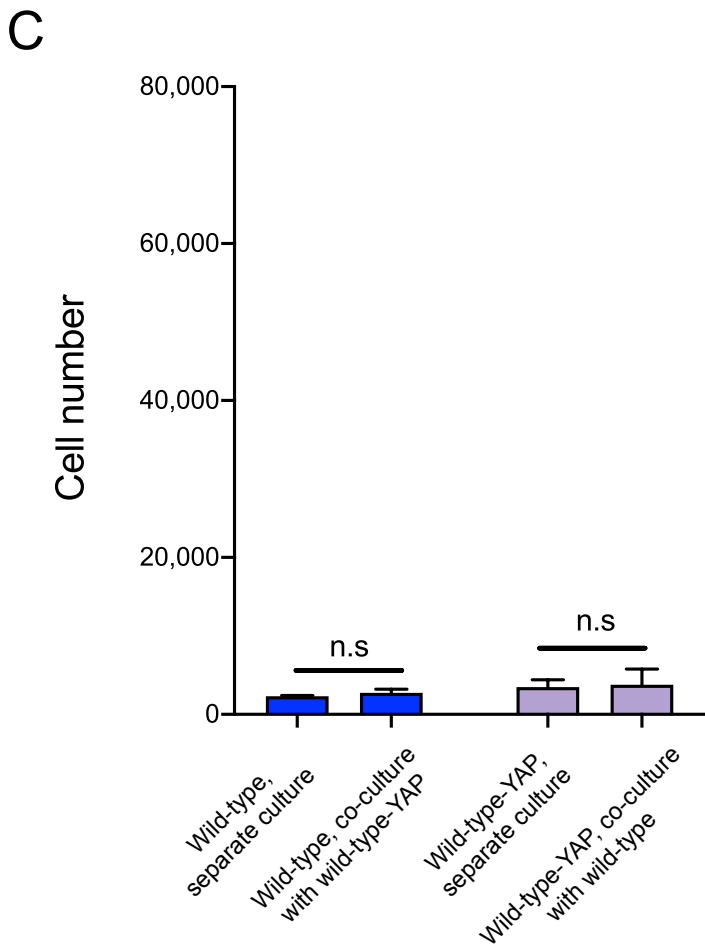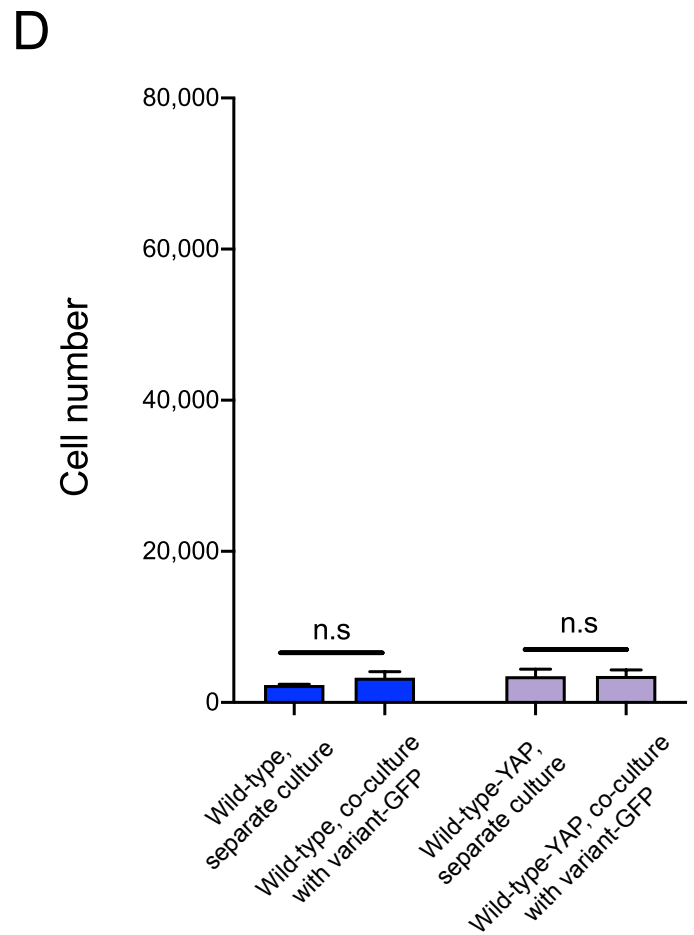

A

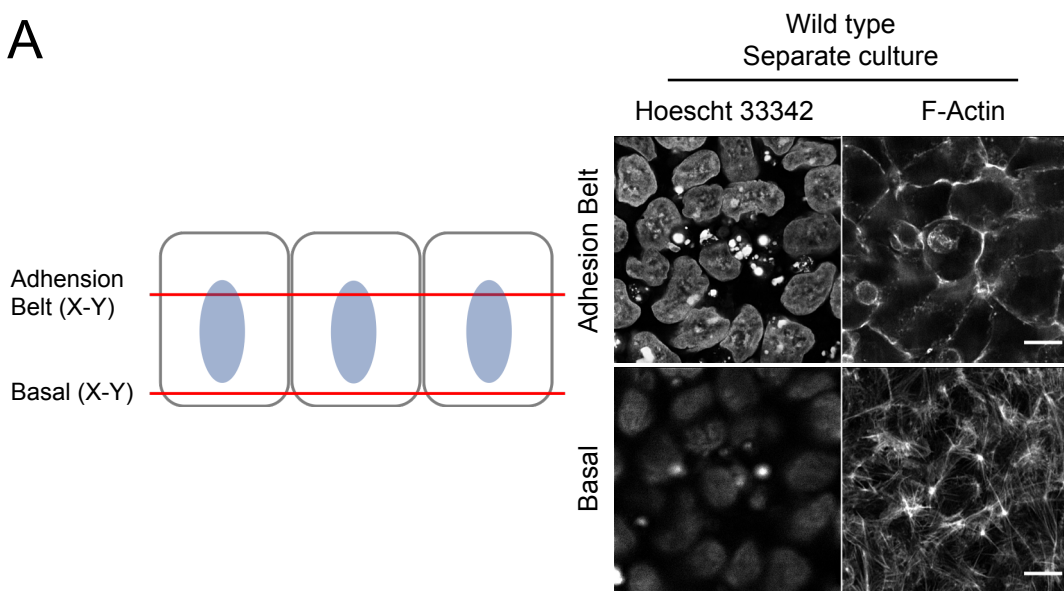

B

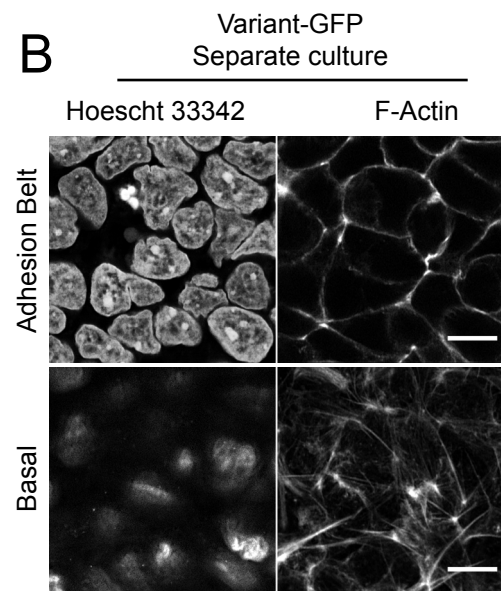

C

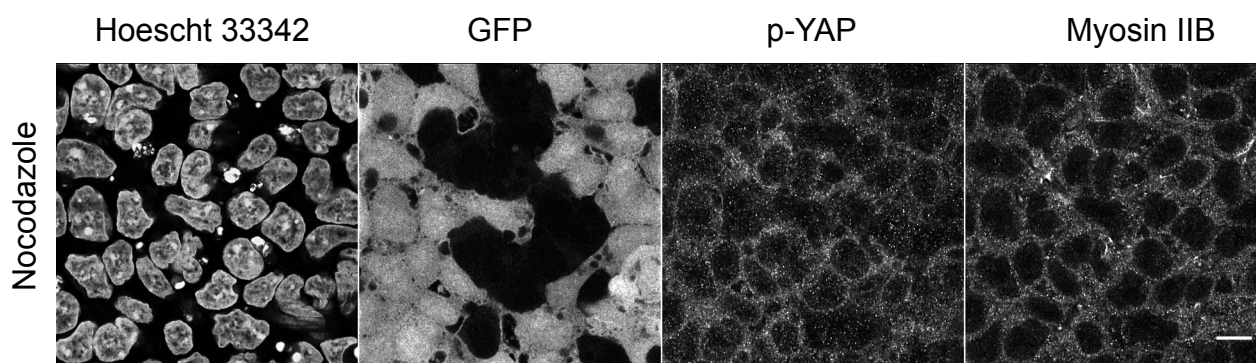

Source: https://www.biorxiv.org/content/10.1101/854430v1.full.pdf
